# Supplementary material for: Transcriptome profile of the sinoatrial ring reveals conserved and novel genetic programs of the zebrafish pacemaker
Source: BMC Genomics. 2021 Oct 2;22:715. doi: 10.1186/s12864-021-08016-z (PMC8487553; doi:10.1186/s12864-021-08016-z)
Supplement: Supplementary file 6 — Additional file 6: Table S2. List of differential GO sets, and their associated genes overexpressed among SAR (p < 0.1). [file 12864_2021_8016_MOESM6_ESM.xlsx]

## Sheet: Table S2
GO set	p-value	genes
retina morphogenesis in camera-type eye	0.000183804	tubgcp4 tubgcp2 tubg1 katna1 spast tubgcp3 hook1 ccdc88c cep126 ccdc88b tubgcp5
lymph vessel development	0.000242607	mef2cb gata5 nkx2.5 pbx2 smarcd3b nkx2.7 tbx5a mef2ca tbx1 prox2 pbx4 prox1a prox1b
brain morphogenesis	0.000404977	hcls1 msrb1a ttc17 arpc4 arpc4l catip arpc2 diaph2 cobll1a
photoreceptor cell outer segment organization	0.000436297	slc26a3.2 glra4a ttyh3b clic2 ttyh2l glra3 slc26a2 glra1 slc12a3 slc12a4 clca1 ttyh2 clcn7 clcn5a slc26a5 clcn5b clic4 slc26a1 clcn6 ttyh3a clcn4 cftr slc26a11 glrbb glra4b abcc4 slc12a9 clcn2c ano6 slc12a7b clcn1a clic5b slc12a10.2 slc12a7a slc12a8 si:ch211-59d13.2 ttyh1 slc12a5b slc26a10 LOC101886645 clic1 si:cabz01102082.1
ATP synthesis coupled proton transport	0.000502772	acp5a acp6 pxylp1 minpp1b minpp1a ppip5k1b ppip5k1a acp1 ppip5k2
negative regulation of Notch signaling pathway	0.000623066	nxnl2 tmx2b dldh pdia6 txndc5 txnl1 gclc zgc:77086 pdia2 pdia4 erp44 gsr tmx1 prdx2 glrx zgc:56493 txndc16 zgc:100906 nxn txn2 tmx3 txndc12 qsox1 irf1b prdx6 glrx5 txn zgc:136472 prdx1 dnajc16 dnajc16l ptgesl zgc:152951 prdx4 pdia5 txndc9 dnajc10 si:ch1073-179p4.3 qsox2 nhlrc2 seph sh3bgrl3 glrx3 txnrd1 glrx2 txndc11 tmx4 pdia3 p4hb si:dkey-109l4.6
convergent extension involved in gastrulation	0.00086545	puf60b gulp1a apip casp9 ppp1r13ba sav1 rb1 caspa bcl2l1 bokb ppp1r13bb prkcda dffb stk3 cideb tfap2b bnip2 ppp1r13l zgc:171731 diablob dmrt2a xiap casp3a ift57 clptm1l apaf1 prkcbb sgk1 aktip igf1ra fam188a melk igf1rb tgfbr2b pdcd10a tp53 tradd gas2b wdr92 ddit4 phlda3 six1a ebag9 zgc:113149 bmf2 fam32a irf1b gapdh rpl11 fas tp63 birc2 pawr bik ciapin1 tigara plag1 gdf6a zgc:153990 badb casp3b …
one-carbon metabolic process	0.000900759	smo glra4a src vcanb fyna glra1 psmd3 nono chd3 fynb ttpa tdgf1 acana mbpa hsbp1b tpp1 prnpb acanb hapln3 sox3 pogza appb lzic nipblb tfpi2 gba2 lyn csk hapln1b shha ppm1g smarca4a ntrk3a agrn hapln1a cenpw ptpro glrx2 irx1a mob1a scinla sar1b appa rtn4b
intrinsic apoptotic signaling pathway in response to DNA damage	0.000911197	man2b1 galnt2 galnt9 emc7 galnt8a.1 poc1bl galnt6 gpcpd1 illr3 galnt14 lgals9l1 grifin chodl lgals8a lgals2b si:ch211-15e22.3 lgals9l3 si:ch211-145c1.1 galnt17 si:ch211-283g2.3 galnt16 hbl4 lgals2a galnt12 si:ch73-86n18.1 galnt7 galm zgc:174904 lgalsla galnt18b mlec si:ch211-10a23.2 adgrl3.1 colec12 galnt1 man2a2 galnt11 hbl3 adgrl2a zgc:153499 si:ch73-12o23.1 si:ch73-335m24.2 ganc ganab zgc:1719…
lens development in camera-type eye	0.000950791	cahz ca2 ca8 ca4b ca4a ca7 trim35-29 ca6 ca5a ca9
intrahepatic bile duct development	0.00116475	tcf7l2 tcf7l1b dvl1a fzd9b dvl3a zic5 frzb fzd3a vangl2 fzd7b lef1 tob1a fzd9a sfrp1a bcl9 tcf7l1a fzd8b tcf7 sfrp5 jun mllt10 fzd8a fzd2 bcl9l dvl1b dvl2 dixdc1b sfrp1b fzd3b apc fzd7a dot1l fzd10 sfrp2 ndp iqgap1 dvl3
negative regulation of Wnt signaling pathway	0.00122455	stim2b slc24a3 atp2b1b ryr1a atp2b1a slc8a1a slc24a4a atp2a1 atp2b3b ryr1b atp13a1 atp6v1aa si:ch73-335m24.5 slc24a1 slc24a2 atp2b3a stim1b atp13a2 trpv4 LOC571043 atp2b2 vapb cnga3a stim2a rgn homer1b
posterior lateral line neuromast development	0.0012982	seh1l ddx3b arl8ba ube2ib kif11 ddx3a mlh1 mis18a ska1 cenpn ube2ia nat15 cenpe ska3 top1l ndc80 knstrn top1 dsn1 oip5 cenph ndel1b
cellular metabolic process	0.00131128	xpnpep3 rnpep npepl1 erap1a metap1d dpp3 erap1b dnpep xpnpep1 metap1 si:ch211-106j24.1 anpepa ctsh npepps enpep lap3 metap2a zgc:152830 erap2 lnpep metap2b anpepb
generation of neurons	0.00157596	slc26a3.2 slc26a2 slc4a4a slc4a8 slc26a5 slc4a1b slc4a2a slc26a1 cftr slc26a11 slc4a4b slc4a2b slc4a10b slc4a10a slc4a7 slc26a10
proteolysis involved in cellular protein catabolic process	0.00158912	aspn dcn sparc serpinh1b serpinh2 zgc:113307 lum tgfbi sparcl1 serpinh1a
anion transmembrane transport	0.00161047	nt5dc1 nt5c1ba nt5c1bb nt5c2l1 nt5c1aa nt5c2a nt5c2b nt5c3a nt5dc2 nt5c1ab
negative regulation of catalytic activity	0.00162301	dstyk scrib chrna5 atat1 chrna2a specc1la glra4a cx43.4 rap1b chrna1 cldnb dlg1 glra3 glra1 cldn7b gabrr2b cldn5b dnm1l zc4h2 cldnc cldn15la kdr si:ch73-151m17.5 chrnb2b scamp5a chrnd cldn11a fermt2 snap25a gabrp gria1a chrnb2l gja3 atad1a fmn2a gabrb3 ctnna2 grin1b grik4 gabrr3a grin1a si:ch211-95j8.2 grin2bb xirp1 cldn11b otofa ache srgap2 gria1b gria3a pi4k2a si:dkey-91f15.8 chrne grin2aa rab1…
establishment or maintenance of cell polarity	0.00165002	rab23 atg3 atg4a atg5 gabarapl2 map1lc3a emc6 gabarapa atg13 wipi2 zgc:92606 atg101 atg4da atg4c gabarapb atg4b pik3c3 atg12 rb1cc1 becn1 ubxn2a nsfl1c tp53inp2 si:ch1073-143l10.2 map1lc3b atg7
hemoglobin biosynthetic process	0.00165014	anxa11b anxa2a si:ch211-266g18.6 prnprs3 syt9a anxa3a syt5b syt13 anxa13l anxa13 anxa5b anxa1a syt9b syt1a anxa4 syt5a sytl3 anxa3b anxa2b c2cd4a sytl2a sytl5 sytl1 sytl2b syt3 anxa11a syt7b syt15 doc2d doc2b anxa1b zgc:101785 syt12 sytl4
biosynthetic process	0.00168914	tpm3 tpm4b fmn2a tpm4a tpma pls3 pls1 pawr fmn2b tpm1 capzb tpm2
dorsal/ventral pattern formation	0.0022113	ercc3 ddx11 chd1l ercc2 rtel1 gtf2h4 rad50 nbn helb ruvbl2 fbxo18 xrcc6 brip1 xrcc5
response to virus	0.00237901	ube2h ptpn4b ptpn4a scfd1 dstyk mapk14a scrib skap2 dicer1 mycbp2 map4k2 skap1 gulp1a fkbp8 tuba1a ak1 pygb adss psme1 chmp2bb aspn psmb6 tubb4b shpk nusap1 arhgef37 eif3eb mapkapk2a dpysl3 sh3gl1b rgs5a pdcd2l miox arcn1a meis3 rasgrf2b bgnb cep135 ube2al lrrc4.2 eif4a1b rcan1a zgc:123105 apip mlst8 ngly1 bin2a pik3cd dhps sox9a emc2 ippk anks1b aprt psma5 klhl32 arih1 clockb tfg hars cdk20 parp…
negative regulation of BMP signaling pathway	0.00241558	nusap1 ercc6l cdk20 reep3b seh1l ncapd2 katnb1 specc1la arl8ba rae1 ube2ib cks1b cdc6 rcc2 fzr1a zgc:63587 cdc73 clasp2 rgs14a katna1 spast pafah1b1b sept2 ube2s pafah1b1a arpp19a dis3l2 nuf2 ensaa klhl21 ska1 arpp19b ccsapb cdc42l si:dkey-23c22.2 rbbp8 ccdc124 cdc45 cdc23 cdc42 ube2ia maea dhx8 mcmbp pelo cdc14ab zwilch rgs14b usp16 ncaph ensab si:ch211-244o22.2 arl3 cks2 ndc80 lzts2a cdc123 chf…
phosphate ion transmembrane transport	0.00263619	cxcr3.1 cxcl12a ackr4b ccl38.1 ccl38.6 cxcr4b cxcl12b ccr9a cxcr4a ccl19a.1 ccr12b.1 cxcr3.3 ccl25b ccl44 cxcl18b cxcl20 ackr4a cabz01093075.1 ccr6a cxcl11.5 LOC100141478 ccr8.1 LOC101884623 cxcl8b.1 cxcl8a
determination of left/right symmetry	0.00265012	psen1 ddi2 zgc:63831 psen2 sppl3 sppl2 hm13 ank2b bace2 ctsd nrip2
regulation of Notch signaling pathway	0.00342627	casp9 malt2 ctsla caspa atg4a zgc:171731 usp33 casp3a casp6l1 blmh zgc:103438 ctss1 lgmn ctslb ctsk ctsh ctsz atg4da atg4c atg4b ctso casp3b ctsba LOC100331324 cflara usp1 usp30 casp8 usp16 casp2 ctsf malt3 casp8l2 ctss2.1 espl1 zgc:110239 malt1 rce1a usp12a si:dkey-10c21.1 usp13 casp7 si:dkey-103e21.5 casp6 si:dkey-228a15.1 LOC100333521 caspxa
maturation of SSU-rRNA from tricistronic rRNA transcript (SSU-rRNA, 5.8S rRNA, LSU-rRNA)	0.00360933	scfd1 b3gat3 mmp14a smo loxa sox9a fgf8a slc35b2 skib foxl1 mmp14b acvr2aa enpp2 ednraa dcn tfap2b dlx1a mbtps1 acvr1l gpc4 aldh7a1 kat6a sparc sec23b foxd3 faf1 whsc1 matn1 dnmt1 fgfrl1a tmem165 edn1 fmr1 polr1d polr1c ctsk skia nog2 sox9b acvr2b cnbpa fgfrl1b runx3 htt nog3 dcaf7 sec13 uxs1 ext2 mbtps2 nog1 runx2b tfap2a tapt1b furina fam212aa furinb camk1da chd7 pappa2 rerea and2 and1 lpar1 nr…
negative regulation of smoothened signaling pathway	0.00365878	phgdh apip cbsb pycr3 psat1 adi1 enoph1 bcat1 cbsa bcat2 mri1 pycr1b aldh18a1 pycr1a
cellular response to estrogen stimulus	0.0036735	cacng5a cacng8a cacng2a gria1b gria3a gria3b gria2b gria4b shisa7b cacng8b cacng4b cacng3b shisa8b
steroid metabolic process	0.00369206	mycbp2 prdm1a slc45a2 meox1 pax3a atp6v0b erbb3b impdh1a ltk kita psenen bnc2 hps5 vps39 sox10 pmela pax7a
regulation of apoptotic process	0.00401229	mmp14a ppp1caa mcamb ryk mmp14b rap1b daam1b ptk7a def6a rap1aa ctnnb1 gpc4 nup62l vangl2 s1pr2 ephb2a gna13b pigp ift80 hipk2 blf ctsba appb swap70b kdm6a amotl2a bbs4 bbs10 dnm2a gna13a lzts2a bbs1 nphp3 ephb4a wnt5b pak1 appa
heme biosynthetic process	0.00408136	pdcd6 zgc:136872 capn12 capn9 zgc:92027 pef1 zgc:92480 capn3b zgc:55262 capn1a capn1b si:dkeyp-50d11.2 capn2b capn8 sri capn15 capn5b capn10 zgc:162184 si:ch211-202f3.4 zgc:85932 capn7 capn5a
Wnt signaling pathway	0.00427925	ryk acvr1l gpc4 lpp vangl2 has2 smad5 mks1 zeb2a zeb2b afp4 wnt5b zbtb4
cellular amino acid biosynthetic process	0.00437706	slc7a9 slc6a16a slc7a10a slc7a14a slc6a6a slc7a1 slc38a4 slc6a9 si:dkeyp-120h9.1 slc7a3a slc38a9 slc7a2 slc36a4 si:ch73-352p4.8 slc38a2 slc38a8b slc7a6 slc7a7 slc32a1 slc7a3b slc7a4 slc6a17 slc7a11 slc7a8a slc38a10 slc7a5 zgc:63694 slc6a16b
NAD biosynthetic process	0.00445219	cdkn1ca rprmb cdkn1ba tp53 cdkn3 rprma cdkn1bb apc cdc123 cdkn1a prr11 zgc:92658 cdkn1cb
closure of optic fissure	0.00449505	slc26a3.2 slc7a10a slc9a6a slc9a8 slc26a1 si:ch73-352p4.8 slc47a1 slc7a7 letm1 slc9a3.1 slc9a2 si:dkey-175a17.3 slc9a6b slc7a8a slc9a7 slc9a5
neutrophil differentiation	0.00466244	cpn1 hdlbpa slc31a1 c9 agxtb ssr4 pah fbp1b ucp1 zgc:66313 fkbp11 serpinc1 aqp12 c3a.3 wbp2 adgrl3.1 lman1 zgc:92744 nupr1 ssr1
cell migration involved in gastrulation	0.00481393	rbpja itga5 fn1a wt1a tdgf1 etv2 foxc1a nr5a1a
cholesterol biosynthetic process	0.0048152	ptk2ab mcamb itgav tbx16 sars hdac6 robo4 kif11 uqcrb hs6st2 meis1b lemd3 iqsec1b kdr gsk3b efna1b uxt flt1 cds1 tal1 efnb2a fermt2 ptk2ba plekhg5a rab5c nrp1b efna1a angpt1 phkg1a dab2 wnt2bb sat1b hexb rab13 thy1 pdcd10a cds2 angptl4 gna13b nrp2b wnk1b git1 ptk2bb fli1b ralbb rps29 rab11a ppih gnb2l1 lpar2a lpar2b klf2a ctsz igfbp2a plcd3a etv2 fli1a pld1a figf ackr3b aggf1 pik3c2a fbxw7 trpc1 …
gluconeogenesis	0.00483595	prkag3b arl14ep nav2b manea txlng lmcd1 zgc:103692 mcoln1a ankrd22 tlcd1 zgc:153911 syngr1a zgc:85722 zgc:113210 pdap1b phc1 pxmp2 si:ch73-70c5.1 commd2 ankrd16 chordc1a phyhipla rabac1 ccdc106a fam8a1b cbwd zgc:63882 zgc:194665 znf800a ccdc9 grwd1 stip1 ccdc85al dgcr6 tmem57a eps8l3b gpm6ba smim14 ncf2 tp53i11b lrrc23 mier3a shisa4 esyt3 saxo2 rtn1a lsm14aa kaznb drg2 tmem178b fam234b zcchc9 klh…
cell adhesion	0.00487949	ada adarb1b adar cecr1b adarb1a cecr1a adat1 adarb2 adad1 adad2
positive regulation of BMP signaling pathway	0.00495452	mvk insig1 apoa1a scap erlin1 ch25hl2 ch25hl1.1 cyp51 ch25h soat2 soat1 lipea sqlea erlin2 npc2 mvda lipeb
RNA methylation	0.00514837	tuba1a vill epb41l3a tubb4b ptk2ab tuba8l4 fmnl2a dmtn pfdn1 phip zgc:65894 cap1 si:dkeyp-57f11.2 qrich1 epb41l3b fermt2 mical2b ptk2ba llgl2 zmym2 sptb tuba8l2 dpysl2b thy1 camsap1b brwd3 si:ch211-173p18.3 zmym4 cnn2 si:ch211-114n24.6 tubb5 tubb2 ptk2bb vil1 zgc:55461 tuba8l rp2 tuba2 ablim1b tuba1b LOC558044 svila tuba1c ablim2 fmnl1a si:ch211-266o15.1 tubd1 ablim1a zranb1a zranb1b elmo2 tuba8l…
actin filament organization	0.00523307	si:ch73-314g15.3 uqcrfs1 ndufv2 aox6 iscub zgc:92275 isca2 fdx1b LOC559859 glrx5 ciapin1 isca1 fdx1l cisd2 xdh fdx1 cmah aifm4 si:ch211-212d10.2 zgc:110843 sdhb cisd1 elp1
locomotory behavior	0.00552167	cpn1 cpa6 ace2 cpa5 prcp scpep1 cpb1 si:ch211-122f10.4 cpvl ace
inner ear development	0.00601483	nalcn si:dkey-28b4.8 cacng5a slc8a3 atp2a2b cacna1ab atp2b1b cacna1c cacng1a slc8a2a ryr1a atp2b1a slc8a1a pkd2 trpv6 itpr1a psen2 cacng8a atp2a1 cacna1ba atp2b3b ryr1b atp2a2a cacng2a atp2a1l slc8a4b cacna1aa cacng5b slc8a1b atp2b3a p2rx4a cax1 slc8a4a letm1 atp2c1 cacna1ha atp2a3 itpr3 tpcn1 micu1 atp2b2 tmco1 saraf cacng8b itpr1b cacng4b cfap74 cacng3b gb:eh507706 cacna1eb slc8a2b
response to cytokine	0.00689939	surf1 cox4i1l zgc:86599 cox6a1 cox4i2 cox4i1 cox6c cox7a2a cox6a2 cox7a3 ndufa4 COX1 COX2 COX3 cox5b2 cox7a1 cox5aa zgc:153317 cox8a cox8b cox5ab cox7c
positive regulation of ERK1 and ERK2 cascade	0.0069199	rpl28 rpl38 ambra1a mcl1b nbas tp53bp2a mcl1a rps15a rbm22 rplp2l insra c3a.1 gata1a cul2 rps4x apoa2 upf1 lin28a npc1 camk1db rpl35 mbnl2 mcm5 vcp rpl5a tab2 fabp3 kcnh1a nr3c1 susd4 igf1ra ttpa sumo3a hsp70.1 rps19 mpi tiprl ndufaf7 paics igf1rb pdcd10a rps3a rps14 mtm1 ca8 orc1 pitpnaa rps29 smg5 rps7 foxo3b ctgfa rpl11 atpif1b fto sumo1 prmt8b stra6 myb tp53bp2b rab18a smtnl rps8a auts2a rpl3…
retinoic acid receptor signaling pathway	0.00702049	snx9a optn arcn1a camkvb rhbg fgfr1a pkd2 panx1b snx33 dnm1l kdr cope scamp5a bdnf sh3bp4a pef1 tbc1d7 otofa arcn1b srgap2 pi4k2a rab13 copg2 spire1a copb2 trappc8 rgs17 slc17a6b pacsin1b cltca cops4 snx18b atg9a clta exoc3l1 cltb clvs2 atg9b copb1 ngfa ntf3 march2 snapin sgk3 panx2 snx18a snx9b gper1 rgs19 becn1 scg3 rab11fip4a cltcb snx17 cltcl1 vma21 tmem123 rab11fip4b
heart jogging	0.00716493	atp1a1a.1 meis1a fgf8a adcyap1a marcksa katnb1 ddx3b tbx2b phf8 phox2a foxl1 marcksb pou3f1 dmbx1a med14 rps15a ppm1k ndrg2 sfpq aldoaa map2k5 foxa3 hoxb5a rps4x acvr1l psen2 zic1 ddc psmd3 bdnf pbx2 emx3 lgi1a mdkb prkci disc1 vax1 ino80e rpl10 gli2a fam57ba adcyap1b hirip3 angpt1 lhx2b dpysl2b her12 pcdh19 pafah1b2 gabarapa znf703 eif3hb lamc1 klhl17 fmr1 ap1m3 emx2 ccsapb pou3f3a tal2 yy1a jun…
ephrin receptor signaling pathway	0.00728539	atp5o atp5g3b atp5a1 atp5f1 atp5l atp5j atp6v0a1b tcirg1a atp5g3a atp5d atp6v0a1a atp6v0a2a atp6v0a2b atp5c1 atp5g1 ATP8 ATP6 atp5ib atp5b si:ch211-140m22.7 atp5ia atp5e atp5h tcirg1b
RNA modification	0.00730443	dstyk uckl1a pink1 igbp1 chmp2bb rabif mvk mtmr2 gys2 ispd psmd11b ahcy rpe camk4 pgam1a smyd2b guk1b yes1 uck2a cdk15 lrrk2 rgp1 ppp2r2ab urod cse1l chmp4bb zgc:56596 vps35 mocs3 yod1 mylipa rap1b etfb atg3 nrbp2b neu3.2 prmt1 dvl1a dnaja2l fgfr1a fyna meis1b fbp2 aacs bnip2 pgm1 pgam1b mecp2 ythdf2 atg4a pgm2l1 g3bp2 htra1b ndufab1b dnm1l pycr3 dvl3a vps26b zfp36l1a psmd13 kpna1 baiap2l2a znf10…
glucose homeostasis	0.00737118	nmnat2 mtfmt gcat got2b zgc:136439 pcyt1aa aadat pbld apmap gmppb eif2b3 sptlc2a alas1 gmppab ccbl1 gmppaa sptlc3 alas2 got1 zgc:194209 got2a coasy sptlc1 pcyt2 fpgs accs got1l1 ndufaf6 si:ch211-217a12.1 pcyt1ba olah gkup aldh1l2 sptlc2b aldh1l1 si:ch73-170l17.1 fasn fdft1 ccbl2 nmnat1
carbohydrate phosphorylation	0.00746192	map2k2a map2k1 map2k7 stk3 map2k5 pak4 rplp1 nek1 oxsr1b oxsr1a rgcc nek12 strada nek4 cab39 LOC107980443 stk11 map3k14 sbk3 map3k3 slka map3k8 map3k2 map2k4a pak2a map2k2b map3k14a map2k4b tpx2 wu:fj77h11 si:dkey-81j8.6 map2k6
mitochondrion organization	0.00776457	scrib pvrl3b cadm2a ctnnb1 ctnna2 mllt4a cadm1a cadm4 gypc cadm1b cd226 cadm3 jupb cadm2b si:ch73-22o12.1 si:dkey-31e10.5 pvrl1a jupa si:ch211-119e14.9 zgc:172122 crtam ctnna1 cdh1
negative regulation of apoptotic process	0.0079452	scrib foxm1 neurod4 isl1 yrk stx2a grapa foxp2 yes1 grap2a ppdpfa blk onecut1 foxl1 syk unc45b fev pou3f1 qki2 fezf1 foxn4 sox19a camk2b1 ndrg2 fyna si:ch211-262e15.1 pbxip1b foxn1 hs6st2 fer foxa3 foxn3 tdrd9 abl2 eya1 foxf1 zap70 neurod2 foxf2a kdr braf ptk6a elk3 henmt1 eya2 elf2a tal1 efnb2a yipf3 ef1 neurod6b grapb ptk2ba foxo3a si:ch211-206a7.2 ctnna2 spast fynb pafah1b1b suv39h1a taf8 nrp1…
transforming growth factor beta receptor signaling pathway	0.00836496	phf8 p4ha2 plod2 zgc:152891 kdm7aa adi1 tdo2b phyhd1 hif1an ido1 alkbh3 adob ogfod2 alox5a hgd asphd2 alkbh5 alox12 alox5b.3 p4ha1b tdo2a haao alkbh6 jmjd6
regulation of cell shape	0.00841538	nme6 ctps1a nme5 nme2a nme7 nme4 ctps1b nme2b.2 nme3 nme2b.1
ventricular system development	0.00850473	gins2 rpa3 rpa1 wrnip1 gins1 orc3 ddx11 fen1 zgc:110269 rrm1 rfc2 pola2 gins4 ssrp1b mcm5 LOC100330864 orc5 ino80e dtl mcm3 pold1 mcm6l rtel1 lrwd1 rfc5 rpa2 ssrp1a gins3 ssbp1 mcm4 prim1 polq pola1 kin mcm10 cdt1 lig3 prim2 pcna rfc1 mcmbp rfc3 mcm6 pole lig1 lig4 polg slx4 nfixb chaf1a nfia top1l mcm8 polg2 orc6 pold3 blm recql4 rrm2 si:dkey-28b4.7 top1 pold2 wrn peo1 orc4 mcm2
carboxylic acid metabolic process	0.00927766	frmd6 cnn1a epb41l3b cnn3b epb41l5 cnn2 epb41l4b limch1a frmd5 cnn3a cnn1b
cholesterol metabolic process	0.00940234	fgf8a eya1 tbx5a nrp1b cxcl12a cxcr4b pax9 akap12b quo ap1m2 nrp1a
mitochondrial electron transport, cytochrome c to oxygen	0.00984899	slc30a1a slc30a4 slc30a7 slc30a5 LOC100002134 slc30a9 LOC564564 slc41a1 slc41a2b slc41a2a tmem163b slc30a10
otolith development	0.00991583	cep57l1 ippk rttn snx10a tubgcp4 katnb1 ift81 ranbp3a ccdc28b rnf19a tubgcp2 nedd1 cdc14aa ranbp1 usp33 b9d2 cep85l ift57 dtl ift74 rilpl2 tubgcp3 h2afx pafah1b1a dync1li2 map9 ift80 cep78 cep68 ssx2ipa ccsapb hook1 lrmp mdm1 ccdc88c sfi1 cdc14ab cep350 sass6 cep85 nin tapt1b brsk2a pcm1 cep290 cep126 dclre1b ranbp3b atp6v0d1 arl3 lzts2a tbc1d31 bbs1 espl1 cep152 nwd1 ccdc88b lzts2b tubgcp5 si:dk…
sensory epithelium regeneration	0.00993115	ntrk1 nod2 tnfrsf1a coch nos2a cd36 rab14l romo1 cftr mpeg1.2 zranb2 pglyrp2 pglyrp5 rab14 defbl1 si:ch211-180a12.2 si:dkey-22f5.9 il1b hamp leap2
negative regulation of angiogenesis	0.0104922	inhbaa bmp2a bmp6 bmp7a tgfb3 bmp4 inhbab admp tgfb2 bhlhe23 inhbb gdf7 lft2 gdf11 gdf6a bmp3 bmp10 bmp7b mstnb tgfb2l gdf10b gdf10a si:ch211-196c10.13
induction of positive chemotaxis	0.0104959	itsn1 itsn2a actn3b stim2b aspn dlc cabp5a mylpfb anxa11b pvalb2 reps1 fgfr1op anxa2a si:ch211-266g18.6 prnprs3 syt9a slit2 prkcsh cdhr1a fkbp9 cdh17 calub pdcd6 man1a1 slc25a23a vldlr pcdh8 slc24a3 cacna1ab LOC569741 actn1 gas6 ehd3 masp2 myl9b pcdh15b myl6 zgc:136872 slc25a24 casq2 pla2g1b anxa3a pvalb6 clgn aif1l caprin1a vcanb nid2b rcvrn3 micu2 cbl icn guca1a si:ch211-282j22.3 slc25a25a capn…
negative regulation of peptidase activity	0.0106066	sdc2 cpm sulf2b zgc:77086 psen2 sulf2a fermt2 ltb4r zgc:100906 sulf1 tmx3 LOC101883645 cxadr prnpb si:dkey-182g1.2 sprn2 si:ch73-213k20.5 si:dkey-19a16.2 sdc4 si:ch1073-214b20.2 sigirr nlgn3b zgc:171500 si:dkey-19a16.7 zgc:113298 si:dkey-19a16.4 si:rp71-36a1.3 si:ch1073-188e1.1 zmp:0000001161 zgc:171686 si:ch73-44m9.1 nlgn2a intu nlgn4b LOC100007503 nlgn2b nlgn4a cd83 si:dkey-71b5.7 ltb4r2a LOC10…
notochord development	0.0108588	atg5 gabarapl2 map1lc3a gabarapa zgc:92606 gabarapb nprl2 becn1 map1lc3b atg7
camera-type eye morphogenesis	0.0110713	mtmr8 rap1b map2k5 rap1aa paqr7b tgfa shc2 map3k2 prok2
proton transport	0.0111232	plod2 serpinh1b serpinh2 mmp9 loxl2a loxl2b zgc:113307 lum si:dkey-14d8.7 dpt serpinh1a
regulation of mitotic cell cycle	0.0113367	ccnh cks1b ccnc ccnt1 cdk2 ccnk ccnt2b ccnt2a ccnl1a cdk6 cks2 cdk4
calcium ion transport	0.011389	scrib tbc1d14 ralgapa2 tbc1d17 tbck sgsm3 usp6nl tiam1b tbc1d22b sgsm1a tbc1d7 grtp1b tbc1d5 tbc1d16 tbc1d10c adprhl1 tbc1d9b tbc1d22a si:dkeyp-19e1.3 tbc1d15 tbc1d9 tbc1d10ab rabgap1l tbc1d2b tbc1d1 si:dkey-110k5.6 sgsm2 evi5b tbc1d2 tbc1d12b tbc1d4 tbc1d30 tbc1d25 sgsm1b ralgapa1 tiam1a si:ch211-266k8.4 ralgapb si:dkey-238d18.4 rabgap1 tbc1d10aa tbc1d8
glomerular visceral epithelial cell development	0.0115162	oclnb magi1b oclna cldnb cldn7b cldn5b cldnc cldn15la cldn11a tjp2b si:ch211-95j8.2 cldn11b epb41l5 rab13 zgc:110333 cldnk cldne cxadr cldn5a cldn2 cldn19 si:ch73-61d6.3 bves cldnj zgc:154006 tjp2a cldnh zgc:136892 cldna magi1a tjp1a tjp1b dlg5b.1 cldn17 cldn15lb cldn15b mpp7a si:ch211-95j8.5 cldn10b LOC553386
determination of ventral identity	0.0116121	smarca1 smarcad1a smarce1 smarcc1a smarcb1a smarca5 actl6a smarcad1b chd8 smarca4a smarcd2 smarcc1b LOC100535713
potassium ion transmembrane transport	0.0116721	ercc6l seh1l zw10 clasp2 mis12 suv39h1a nuf2 lrwd1 mis18a cenpl ska1 cenpn cenpp zwilch ndc80 si:dkey-57a22.11 oip5 spc24 meaf6 sgol1 spdl1
methylation	0.011717	ppm1ba ppm1f ppm1da zgc:92137 ppm1k ppm1bb ppm1db ppm1e zgc:66313 ppm1aa ilkap ppm1ab ppm1nb pdp2 ppm1la ppm1g si:ch211-149b19.3 pdp1 ppm1lb gbe1b
ribosomal large subunit assembly	0.0118806	ptpn4b ptpn4a tuba1a epb41l3a frmd6 tubb4b nusap1 cep135 snx10a fam92a1 atat1 pin4 zgc:101810 ptk2ab rock2b gys2 tubgcp4 katnb1 yes1 prc1b tuba8l4 specc1la klhl41b arl8ba rae1 src ddx11 fes fer tubgcp2 pkd2 usp33 zgc:65894 farp2 tbca myo10 rsph9 b9d2 rock2a prepl tln2a arpc5b mid1ip1b evpla pdlim1 epb41l3b nf2a fermt2 tyk2 clasp2 jak1 ezra ift57 poc1b dynlrb1 katna1 si:ch211-165e15.1 dspa ptk2ba …
muscle contraction	0.0119876	pik3cd cxcl12a ccl38.1 ccl38.6 fpr1 cxcl12b cxcl14 zgc:158659 pik3cb pik3ca cxl34b.11 cxcl11.5 LOC100141478 ccl39.3
floor plate formation	0.0120879	isl2a tardbpl slitrk2 cnr1 pnpla6 aldoaa olfm1a smn1 rbm7 ctnna2 spast lingo1a chodl lingo1b uba1 pitpnaa shtn1 tardbp zfyve26 elp3 ogn rtn4a prdm14 lrtm2a lrtm2b lrfn4a appb cdk5 epyc zfyve27 col6a2 gba2 dagla exosc8 rgs4 zdhhc17 si:dkey-1j5.4 slitrk5b sqstm1 lrrc38a si:ch211-159i8.4 lrfn2b slitrk3a agrn mfn2 plppr4a col6a4a slitrk4 lrrc38b trip4 exosc3 lama1
regulation of autophagy	0.0121861	scrib ptpra mmp14a lats1 desi2 yes1 csrp1a mmp14b marcksb prmt1 fyna fer def6a gpc4 ptprea bbs12 ptpn11a ptpreb tab2 disc1 lpp fynb vangl2 fzd7b tdgf1 s1pr2 dsc2l prickle1a gnb2l1 tmem237a porcn fzd2 tnika ptenb swap70b fzd7a bbs4 csk bbs10 tmem237b bbs1 diaph2 ror2 tmem67 map2k4b mapk9 lats2 pfn1 wnt5b
mitochondrial electron transport, NADH to ubiquinone	0.012473	atp7a p2rx5 slc30a1a slc30a4 slc9a6a p2rx3a panx1b slc30a7 slc9a8 panx1a p2rx3b atp13a1 p2rx7 p2rx4b p2rx4a hrc slc30a5 si:dkey-162b23.4 LOC100002134 slc30a9 atp7b slc9a3.1 slc9a2 trpm5 trpm4a LOC564564 atp13a2 panx2 si:ch211-173d10.1 trpm4b.2 slc41a1 slc41a2b slc9a6b slc41a2a slc9a7 slc9a5 tmem163b slc30a10
negative regulation of cell migration	0.0126854	aplnra mmp14a tbx2b itgav csrp1a eomesa ryk mmp14b eaf2 def6a lbr wnt11r gpc4 rock2a ptges stat3 dscama ezrb gna12a vangl2 ankrd6b gpc3 s1pr2 has2 cxcl12a gna13b prickle1a cdc42 dkk1b snai1b apln cxcl12b snai1a cxcr4a celsr1b ptger4a fzd7a git2a slc39a6 celsr1a esrra eaf1 wnt4a gna13a lzts2a rac1a diaph2 ctnnd1 megf8 pcdh18a apoc1 cyt1 zgc:153713 apela wnt5b cdh1
post-anal tail morphogenesis	0.0127747	ercc6l seh1l prdm9 stn1 smarcad1a esco2 ssrp1b smc2 smc3 ints7 clasp2 h3f3a dtl ehmt1b suv39h1a h2afx si:dkey-261m9.12 h3f3c nuf2 lrwd1 histh1l banf1 ssrp1a h1f0 cenpl setd7 smc4 ska1 nbn suv420h1 setdb1a mei4 loxl2a loxl2b cenpp hp1bp3 cdk9 h3f3d lrmp si:ch211-113a14.24 top3a h1fx llph suv39h1b zwilch smc1al zgc:153409 setd2 cdk12 ehmt1a h3f3b.1 si:ch1073-429i10.3 h2afva dclre1b zgc:113983 zgc:1…
embryonic heart tube morphogenesis	0.0129154	dynll2b kif4 kif11 dnal4a dnai1.2 wdr78 wdr34 dynll1 dync1i1 dynll2a kif5ba kif5c wdr60 dync1i2a dnal4b si:cabz01066312.1
small GTPase mediated signal transduction	0.0130482	opn1sw2 synj1 tmtops3a opn1lw2 opn1lw1 opn3 opn4b rgra tmtops2a opn7d opn8b opn1mw1 opn6b opn6a
embryonic hemopoiesis	0.0132958	eif4a1b ddx19 ddx3b ddx39aa si:dkey-156n14.5 ddx49 dhx16 tdrd9 skiv2l2 ddx39ab dhx15 eif4a2 ddx61 ddx3a ddx56 ddx23 ddx18 ddx1 ddx31 ddx39b ddx5 dhx29 dhx40 dhx33 helb dhx8 dhx57 dqx1 ddx28 dhx34 ddx6 skiv2l dhx37 dhx32a dhx30 dhx9 helq ddx27 dhx38 dhx36 ddx54
isoprenoid biosynthetic process	0.0134116	pfkfb3 pomk galk2 rbks pfkfb2a pfkpa galk1 pfkfb4b khk pfkfb1 hkdc1 hk1 pfkfb4a gck hk2
myeloid cell differentiation	0.0144057	nusap1 ercc6l cdk20 reep3b seh1l ncapd2 katnb1 phf8 specc1la arl8ba rae1 ube2ib cks1b src rbl1 e2f7 prkcda rcc2 aurka anapc16 esco2 tfdp1b zgc:63587 rad17 tfdp1a vcp clasp2 katna1 llgl2 spast mis12 pafah1b1b suv39h1a sept2 lin9 h2afx sept3 melk ube2s pafah1b1a arpp19a erh dis3l2 nuf2 tp53 tipin ensaa aurkb cdkn3 klhl21 gadd45gip1 ska1 arpp19b ccsapb nbn si:dkey-23c22.2 wtap fam32a tfdp2 rbbp8 ccd…
sterol biosynthetic process	0.0146328	mterf3 cited2 cited4a pnpla7b tp63 rbm41 ppp2r2ca pnpla7a cited1 nudcd2 zgc:194285 si:dkeyp-94h10.5 si:ch211-276i12.9 si:dkey-77f5.3
ubiquinone biosynthetic process	0.0148125	gins2 ercc3 ruvbl1 gins1 ddx11 chd1l gins4 mcm5 pif1 ercc2 mcm6l rtel1 gtf2h4 rad50 mcm4 nbn cdc45 helb ruvbl2 mcm6 fbxo18 xrcc6 brip1 chd8 blm recql4 wrn xrcc5 peo1 mcm2
pronephric glomerulus development	0.0153645	smo cdk20 ift81 unc119.1 sept6 ift46 ttc26 ttc21b arl13b pkd2 rsph9 b9d2 tlr4ba ift57 ift74 rilpl2 tmem218 ift88 arl6 wdr19 flr cep41 ift80 bbs5 ccsapb bbs2 tbc1d32 tmem237a ift172 tmem231 rp2 tulp4a ccdc103 gpr161 wdr34 mak bbs7 tapt1b trpv4 tub si:dkey-220f10.4 ccdc151 zmp:0000000711 zgc:158640 cfap77 wdr35 bbip1 arl3 tmem237b LOC103908677 wdr60 nphp3 cep131 tmem138 zgc:194281 cfap157 ccdc40 cf…
establishment of mitotic spindle orientation	0.0153802	tbc1d14 rab23 zgc:100846 atg9a rab24 atg9b tbc1d12b sqstm1 tbc1d25 nbr1a nbr1b tp53inp2
phosphatidylinositol 3-kinase signaling	0.0155743	cxcr3.1 ackr4b cxcr4b ccr9a cxcr4a ccr12b.1 ackr4a cabz01093075.1 ccr6a ccr8.1
regulation of ion transmembrane transport	0.0159233	wdr32 plrg1 rbx1 ddb2 rnf7 cul4b dcaf12 cul5a dcaf17 fbxw5
potassium ion transport	0.0160174	ippk rttn nedd1 wdr5 b9d2 ift57 rilpl2 ift88 cep41 ssx2ipa bbs5 ccsapb bbs2 ift172 ift52 bbs7 tapt1b ccdc151 wdr35 rilp bbs1 cfap157 wtip
defense response to bacterium	0.0161926	zgc:101810 arpc1a arpc5b arpc1b arpc5lb arpc5a arpc5la actr2a arpc4 arpc3 arpc4l actr2b arpc2 zgc:86896
retrograde vesicle-mediated transport, Golgi to ER	0.0162447	snx9a camkvb rhbg pkd2 snx33 rab13 spire1a pacsin1b cltca snx18b atg9a clta cltb atg9b snx18a snx9b gper1 vopp1 cltcb snx17 cltcl1
mitochondrial translation	0.0162503	cav3 mapk1 cavin2a cav2 bves cavin1b mapk3 zgc:158296 cavin2b cavin1a cav1
regulation of ARF protein signal transduction	0.0163898	ryk tbx16 eaf2 dcn hdac1 gpc4 dvl3a ptpn11a vangl2 pigp ppp1cb creb1a akap12b dvl2 swap70b mpzl1l tax1bp3 zeb2a eaf1 bbs1 tmem67 zeb2b glis2b wnt5b
signal transduction	0.0163901	serinc5 zgc:73226 mxc bnip3la bnip3lb ifit15 irf5 ifit8 crfb1 tlr7 mavs LOC572297 ifit11 ly86 ifit12 LOC793232
cell morphogenesis	0.0165074	adrb1 adra1ba adra1d adra1aa gpr101 adra2a adra1bb adrb2b adrb2a adra2da adra2b
metabolic process	0.0168401	tdh2 echs1 ppm1ba man2b1 pfkfb3 cwf19l1 rtca arsh tdh acsl1b zgc:153896 acsl4a acsbg2 spam1 zgc:112496 nmnat2 acaa1 acsm3 ispd rpe dip2ba sucla2 pgam1a adat3 gcat ppm1f enpp1 got2b dera tktb abat slc27a1a dus4l impdh2 acat2 odc1 ftcd mocs3 renbp pigc uevld ppm1da npl zgc:92137 ppme1 dcps dpydb ppm1k acsl4b pptc7a si:ch211-12m10.1 pcyt1aa enpp2 fen1 aadat ppm1bb aldoaa pigo scp2a umps zgc:110269 a…
miRNA mediated inhibition of translation	0.0172552	nalcn p2rx2 chrna5 asic4b p2rx5 slc30a1a chrna2a slc30a4 asic1a chrna1 p2rx3a mmgt1 p2rx1 chrnb2b slc30a7 chrnb2l timm8a p2rx3b chrne chrnb3b calhm2 p2rx7 p2rx4b p2rx4a hrc slc30a5 chrnb3a LOC100002134 chrna6 timm8b chrna2b slc30a9 trpm4a LOC564564 si:ch211-173d10.1 trpm4b.2 chrnb1 slc41a1 chrna4b slc41a2b slc41a2a zgc:195170 piezo1 chrng tmem163b asic1c cngb3.1 LOC562466 trpm1b slc30a10
habenula development	0.0177655	nf1b tbx20 mcamb itgav mtmr8 nf1a hey2 kdr acvrl1 pak2b flt1 tal1 efnb2a tnnt2a cxxc1b hsp90ab1 sox7 angpt1 pdcd10a rasa1a rcbtb1 has2 ephb2a tll1 git1 stab2 notch1b etv2 angpt2b foxc1b hsp70l ptenb figf ilk sox18 mfap2 pak2a vegfc ptena arhgef7b efnb2b ptprb amot foxc1a lmo2 ephb4a lama1 vegfaa
membrane depolarization during action potential	0.0178889	sox9a rap1b col11a2 rap1aa mef2ca tbx1 fat3a tmem165 edn1 sec24d furina plcb3 ids rerea chsy1 grem2b
regulation of mitotic nuclear division	0.0179742	cdk20 cdk15 cdk2 cdk10 cdk19 cdk9 cdk7 cdk5 cdk12 cdk6 cdk14 cdk13 cdk1 cdk4
negative regulation of transcription from RNA polymerase II promoter	0.0180001	got2b glud1a ddc gss acy1 got1 got2a cad aspg got1l1 pm20d1.2 otc hdc tha1 si:ch73-263o4.4 glud1b ccbl2
oxidation-reduction process	0.0182708	gbx2 fgf8a brf1b otx2 lhx1a pax2a otx1a ca8 hgfa klf8 met rnf216
organic anion transport	0.0183327	cep135 fam92a1 plk4 cep89 nedd1 poc1b cep41 ccsapb ccdc92 mdm1 sass6 cep19 nin cep162 si:dkeyp-20g2.3 cep83 si:ch73-100l22.3 ccnf
retinal ganglion cell axon guidance	0.0184396	rpl7 rpl15 rpl22l1 rplp2l rpl8 rwdd1 rplp1 rps3a rpl30 rpl9 rpl4 rps7 rpl7l1 rpl31 ftsj1 rpl6 rpl22 rpl29 rpl35a rpl36 rplp2 rpl26 rps3
iron ion homeostasis	0.0185234	man2b1 pygb shpk gale si:ch211-236h17.3 mgat4b spam1 rpe manba uevld zgc:92137 b4galt6 fbp2 pygmb pgm1 pgghg ppp1r3cb pgm2l1 zgc:77112 lctlb slc3a1 mdh1aa pgm2 si:dkey-199f5.8 ldhba rbks fbp1b pgls fbp1a b4galt7 gnpda2 pgm3 chst12a glb1l zgc:66313 b3gat2 mpi chst10 hexb chst11 si:dkey-224e22.2 ins fuca1.2 fuca1.1 lctla gla glb1 slc3a2a si:ch211-226m16.2 hyal3 gpd1c slc3a2b gnpda1 b4galt5 zgc:1016…
maturation of LSU-rRNA	0.0185666	aplnra unc45b fgfr1a myl7 cmlc1 aplnrb sgcg smad4a synpo2lb sgcd
negative regulation of insulin receptor signaling pathway	0.018591	snx10a fam92a1 unc119.1 rfx2 b9d2 poc1b cfl1 arl6 flr cep41 tmem237a tmem231 ttc17 ccdc103 tmem107 bbs7 tapt1b catip atp6v0d1 wdr35 tmem237b intu cep162 foxj1b tmem138 zgc:194281 foxj1a
determination of left/right asymmetry in lateral mesoderm	0.0187514	meis1b hey2 acvrl1 tal1 ptprja myo6a vegfaa gipc1
pronephros development	0.0191886	tubb4b fgf8a cdk20 snx10a fam92a1 cep89 dynll2b rpe ttc9c ift81 ehd3 unc119.1 sept6 ccdc28b enpp2 ttc36 ttc26 ak5 rer1 arl13b rfx2 cdc14aa ehd1b wdr5 b9d2 flncb mcrs1 ift57 poc1b cfl1 cdc14b nek1 ift74 rilpl2 ezrb tsc1a rfx4 ift88 vangl2 pax2a arl6 lect2l si:dkey-224e22.2 znf703 hs3st1l2 gmnn wdr19 flr cep41 ift80 bbs5 cetn4 bbs2 tbc1d32 tmem237a ift172 tmem231 fto ttc4 cdc42 myb mustn1a fzd2 jaz…
single organismal cell-cell adhesion	0.0194919	penka elovl5 snx14 sarm1 glra1 brinp2 pnocb pi4k2a thy1 gria4a tp63 npffl brinp3a.2 gper1 brinp3b brinp3a.1 brinp1
odontogenesis	0.0196579	ufd1l nqo1 ca2 atp6v0a1b keap1a casp3a ahr2 apobb.1 hmox1a nt5c2l1 zgc:77439 smpd2a nfe2l2a cpb1 ahrrb sort1b tiparp hipk3a tgfbi keap1b sult6b1 cyp1a cyb5a eef2b gstp1
hippo signaling	0.0198349	cacng5a dennd5b slc24a3 cacna1ab cacna1c cacng1a ryr1a pkd2 trpv6 itpr1a slc24a4a dennd5a cacng8a cacna1ba pkd2l1 ryr1b trpc7a cacng2a pkd1b si:ch73-335m24.5 cacna1aa cacng5b slc24a1 slc24a2 trpc6a tmem37 trpm5 trpv1 cacna1ha trpc1 itpr3 trpv4 LOC571043 trpc6b tmco1 trpc5a trpc4a cacng8b itpr1b cacng4b cfap74 cacng3b cacna1eb
response to stress	0.0209856	zgc:86764 prc1b ect2 kif23 map9 zfyve26 kif20a arl3 lzts2a lzts2b rab11fip4a prc1a rab11fip4b
signal transduction by protein phosphorylation	0.0210953	camk4 ube2ib hdac6 rpl22l1 sae1 meis1b dkc1 scml4 smarcc1a smarcd1 tal1 sumo3a cpsf1 cebpa rps24 sumo1 ube2ia myb hsp70l sf3b1 topbp1 myef2 haus3 eaf1 smyd5 nol9 gfi1b mbd6 znf574 tfec pbx1a metap2b sumo2b
apoptotic process	0.0212177	chrna5 chrna2a chrna1 chrnb2b chrnd chrnb2l chrne si:ch211-39a7.1 chrnb3b chrnb3a chrna6 chrna2b chrnb1 chrna4b chrng si:ch73-380n15.2 chrna3 chrnb4 chrna7
steroid biosynthetic process	0.0215358	pdx1 rab23 sept6 bmp4 gmnn ikzf5 ccdc151 grk5l atr
fin regeneration	0.0215915	ccdc114 rsph9 ccsapa ift88 ccsapb ift172 ift52 ccdc103 bbs7 ccdc151 dnali1 bbs1 rp1l1a ccdc40 cfap53 tmem141
steroid hormone mediated signaling pathway	0.0218883	robo3 aida acvr1l acvrl1 bmp7a bmp4 admp bmp1a ankrd6b smad5 tll1 ppp4ca smad4a ppp4cb mgaa
cilium movement	0.0219591	slc17a9b slc4a4a slc4a8 slc4a1b slc4a2a slc4a4b vdac1 slc4a2b slc17a5 slc4a10b slc4a10a slc4a7 slc4a11 si:ch1073-513e17.1 slc4a5
lipid metabolic process	0.0228808	urod gad2 ddc csad gad1b amd1 pisd uxs1 sgpl1 acmsd urad hdc mvda pdxdc1
RNA secondary structure unwinding	0.0229332	rps15a rps9 eif2d rps4x rpsa rps6 rps23 rps27.1 mrps18a rps21 rps26l rps19 rps10 rps28 rps13 rps14 rps12 rps26 rps24 rps29 rps7 rps5 rps16 zgc:114188 rps11 rps8a rps8b mrps18c rps15 rps2 si:dkey-159f12.2 rps3 rps17
exocrine pancreas development	0.0229716	zgc:100846 inaa neflb smn1 slc25a46 rab10 myo5b myo9aa si:dkey-76i15.1
otolith morphogenesis	0.023032	cers5 cers2a cers4b sgms1 cers4a cers3b smpd2a degs2 cers6 zgc:91976 cers2b cers1 zgc:162183 cers3a
negative regulation of neuron apoptotic process	0.0231633	pvrl3b cadm2a cadm1a cadm4 gypc cadm1b cd226 cadm3 cadm2b si:ch73-22o12.1 si:dkey-31e10.5 pvrl1a si:ch211-119e14.9 zgc:172122 crtam
execution phase of apoptosis	0.0234206	atat1 tmem57a robo3 tmem57b psen2 si:ch211-57i17.1 fez1 ctnna2 ccsapa ompb shtn1 ccsapb alcamb si:dkey-288i20.2 gper1 cntf fam168b
fructose 6-phosphate metabolic process	0.0244116	dstyk scrib rhbg dlg1 llgl1 lin7a pkd2 aqp1a.1 numb lin7c slc4a2a otofa lin7b epcam cxadr erbb2ip pdzd11 gper1 dlg3 dlg1l
cilium organization	0.0245132	smo fgf8a her6 lhx1a acvr1l her7 kat6a efnb2a en2a igf1ra pax2a notum1a ncor1 ctnnbip1 gdf11 pax6b gli3 aldh1a2 LOC100149863 kdm6al shha zic3 frmd8 agrn fgf3 fgf17 pax6a zbtb4
endoderm development	0.0246228	atp6v1h atp5g3b atp6v1ba atp6v1e1 atp6v0a1b tcirg1a atp5g3a atp6v0a1a atp6v1c1a atp6v1e1b atp6v0b atp6v1aa atp6v0a2a atp6v0a2b atp6v1c1b atp6v0cb atp6ap1b atp6ap1a atp6v1b2 atp6v1f atp5g1 atp6v0ca atpv0e2 atp6v0d1 atp6v1ab atp6ap1la atp6v0e1 tcirg1b
fatty acid beta-oxidation	0.0246662	tmem59l isl2a isl1 robo3 gemin2 fam53b plxnb1b smn1 katna1 spast grnb plxnb3 tppp2 kif1b tardbp ist1 appb sema5a ulk1b plxnb1a tusc5a ulk2 clns1a
muscle fiber development	0.0246826	dlc slc8a3 cx43.4 slc8a2a dla jag1b slc8a1a jag2a dld adgrv1 jag2b gja3 itgb4 jag1a si:dkey-91f15.8 slc8a4b gja5a cx32.3 cx28.9 cx43 cx30.3 cx35.4 slc8a1b fras1 slc8a4a frem1b LOC100535882 gja5b gja8a frem1a cx39.4 dll4 gjd2b cx28.8 LOC565638 frem3 cx34.4 frem2a cx52.9 si:dkey-91f15.1 slc8a2b frem2b
cellular response to hormone stimulus	0.0247424	itm2ba apoeb itm2bb itm2ca apba2b apba2a apbb1 si:ch73-40i7.5 apoea apba1a
cytoskeleton organization	0.0247521	zgc:101810 arpc1a arpc5b arpc1b arpc5lb arpc5a arpc5la actr2a arpc4 arpc3 arpc4l wash1 actr2b arpc2 zgc:86896
mitochondrial transport	0.0252235	nxnl2 cyp7a1b abce1 tmx2b dldh atp1a2a ryr1a slc8a1a gpcpd1 pdia4 flnca flncb gsr atp2a1 kng1 ryr1b synj1 prdx2 mlh1 aco1 glrx zgc:92066 txndc16 nxn txn2 LOC557301 mtm1 tmx3 txndc12 hk1 prdx6 slc8a4a auts2a prdx1 mtmr14 bbs7 gck ptgesl zgc:152951 prdx4 kif13a txndc9 cnga3a mlpha dnajc10 diaph2 shroom2b shroom2a toe1 nhlrc2 seph zgc:109934 glrx3 txndc11 tfr1a hk2 tmx4 homer1b znf644b hamp wnt5b pd…
neural tube formation	0.0254003	uevld sae1 tsg101b pcmt rimkla lipt1 ttll5 uba1 adprh tsg101a pcmtl pcmtd1 pcmtd2 ttll6 ttll11 ttl ttll7 lipt2 wdyhv1 si:dkey-181m9.8 ttll4 si:dkey-82j4.2 ttll1 ttll12 ero1b LOC100536777
mRNA polyadenylation	0.0258889	itgb6 itga10 cdhr1a ptk2ab flot2a cdh17 ptprfb tbx2b itgav itga5 pcdh8 pvrl3b ncam1b itga11b src pcdh15b sele vcanb thbs1b thbs3b fer itgb5 cdh6 ctnnb1 cdh4 pnn itgb2 ncam2 fat1a tln2a ctnnal1 cdh2 fat2 fat1b parvb rpsa thbs4b efnb2a fermt2 tnr lama4 cdh11 tnc si:ch211-241e1.3 itgb1b.2 ptk2ba cyr61 cdh7 emilin1a ctnna2 dscama pcdh17 si:ch211-106h11.3 dscamb itgb4 podxl itga9 fat3a pcdh19 thy1 par…
heart looping	0.0264844	atp1a1a.1 prnprs3 ispd ctnna2 pafah1b1a rars2 pcdh19 tdgf1 lamc1 tsen54 lgi1b tgif1 shank3a syngap1b mgaa lamb1a lama1
very long-chain fatty acid biosynthetic process	0.0267435	orc3 cdc6 mcm9 pola2 gins4 mcm5 orc5 cdc7 mcm3 mcm6l mcm4 cdc45 pola1 mcm10 mcm6 topbp1 mcm8 orc6 orc4 mcm2
bicarbonate transport	0.0269268	tmod2 limk1b pfn2 rock2b coro2a coro1b daam1b ssh1b sdcbp2 fmnl2a pfn2l daam1a cap1 si:ch211-89p3.3 iqsec1b rock2a pak4 cdc42bpb coro1cb si:ch73-362m14.4 wasf2 daam2 xirp1 phactr4b tagln2 coro1ca klhl17 fscn1b ehd2b gas2l3 coro1a ablim2 si:dkey-56f14.7 fmnl1a ssh1a rock1 wasf3a fscn1a flii wasf3b pak2a zgc:109889 xirp2a iqsec1a fmnl2b diaph2 pi4kaa iqsec2b pacsin2 coro2ba pfn1 ablim3 diaph3 flnb …
chemical synaptic transmission	0.0270044	foxm1 foxp2 si:ch211-262e15.1 foxn1 lhx1a foxf1 foxf2a foxo3a si:ch211-206a7.2 foxd1 foxk2 foxq1a fscn1b foxk1 piwil1 foxo3b ankrd11 foxq1b foxc1b foxo4 foxi3a foxj2 foxd2 foxo1b foxg1c LOC100149117 foxg1d foxf2b foxq2 fscn2b foxj3 foxp4 ikbkb zgc:162612 si:dkey-7e14.3 foxa foxb1a foxo1a
intracellular receptor signaling pathway	0.0270187	cdh4 hsp70.3 hsp70.1 pitx2 aldh1a2 sox11a sox11b pim1 ccnd1 lama1
regulation of cell adhesion	0.0272678	hdac8 kmt2a prdm9 smyd2b aebp2 phf8 hdac6 smarca1 hira smarcad1a hdac1 kdm7aa carm1 prkcbb ing5a dpf3 suv39h1a atxn7l3 kansl3 ing4 ing3 mysm1 lrwd1 hdac3 setd7 suv420h1 morf4l1 setdb1a abraxas2a asf1bb loxl2a loxl2b rnf8 prmt7 smarca5 anp32e usp16 nat15 dot1l ing5b eny2 dnajc2 smarcad1b hdac7b hdac5 chd8 babam1 bag6l cited1 brd4 si:dkeyp-118b1.2 hdac10 h2afy2 hdac4 suz12b h2afy eed asf1ba meaf6 j…
mitophagy	0.0272714	scrib epb41l3a pvrl3b rap1b lin7a pnn epb41l3b lin7c mllt4a lin7b pdzd11 hepacama pcdh12 ajuba jcada magi3a wtip
chromatin silencing	0.0273525	slc4a4a slc4a8 slc4a1b slc4a2a slc4a4b slc4a2b slc4a10b slc4a10a slc4a7 slc4a11 slc4a5
glycolytic process	0.0277537	npy8br rad21a myh11a tnnt2a gli2a npy1r sulf1 abraa acta2 figf shha prokr1a
Rho protein signal transduction	0.0282097	ptpn4b ptpn4a epb41l3a anxa2a dynll2b farp2 epb41l3b nf2a ezra si:ch211-165e15.1 syne3 ezrb nf2b dnal4a epb41l5 anxa2b msna dynll1 epb41l4b pleca frmd7 dynll2a frmd4ba tor1 dnal4b eppk1
heart morphogenesis	0.0283013	sars hs6st2 tars nrarpb tnnt2a lef1 unc5b spns2 vegfc dll4 nrarpa vegfaa igfbp7 ntn1a
carbohydrate metabolic process	0.0284579	map4k2 tnikb gadd45bb gadd45gb.1 gadd45ga stk24b gadd45ba map4k6 mink1 stk25b map4k5 gadd45aa tnika stk26 map4k3b smarca4a map4k3a
response to lipopolysaccharide	0.0286201	il17d inhbaa bmp2a tnfb bmp6 bmp7a tgfb3 bmp4 inhbab admp tgfb2 grem1a il11a inhbb tgfb1a ccl38.1 ccl38.6 gdf7 lft2 gdf11 il15 gdf6a il12bb tnfsf10 ccl19a.1 bmp3 bmp10 bmp7b csf1b mstnb tgfb2l gdf10b cntf cxcl18b csf1a clcf1 ndp thpo gdf10a il1b cxcl8b.1 grem2b cxcl8a
rRNA processing	0.0290135	rpa1 xrcc1 ercc4 msh2 neil1 rev1 rad23aa neil3 rad23b poli ercc1 zgc:110224 xpa xpc nbn rad1 ddb2 tp63 dclre1c rad23ab ogg1 gtf2h3 dclre1b xrcc6 xrcc5 rps3
fatty acid metabolic process	0.0294942	mcamb dpysl2b lingo1a ascl1a lgmn neurog1 cnp ptena hmgb1a gap43 rtn4b
canonical Wnt signaling pathway	0.0296883	map3k5 zak si:ch211-45c16.2 map3k15 map3k9 braf map3k7 LOC557301 LOC405768 araf raf1b map3k3 taok3a map3k2 si:ch211-120p12.3 raf1a map3k12 si:ch73-380l10.2 si:dkey-181f22.4
inorganic anion transport	0.0301098	mapkapk2a rasgrf2b marcksa camkvb camk4 camk1gb marcksb camk2b1 mknk2a camk2d2 camkk1b mknk2b cnn1a camk1db mknk1 mapkapk2b camsap1a kcnn3 nos2a lsp1 mapkapk5 camk1b cnn3b phkg1a phka2 camsap1b camkk1a marcksl1b eef2k cnn2 marcksl1a camk2d1 pnck camk1ga stra6 pcp4a camk2a phkg2 camk2g2 camkvl camsap3 camsap2b camsap2a nos1 camk2g1 map6b map6a camk1da phkb si:ch73-60h1.1 kcnn4 cald1b kcnn1a si: ch…
cardiac muscle cell proliferation	0.030211	acot8 acot7 acot18 acot11b acot20 acot15 acot12 acot11a acot13 acot17
lipid transport	0.0304848	srcap uevld gad2 ddc mdh1aa ldhba csad gad1b mdh2 sgpl1 ldhbb hdc ldha pdxdc1
negative regulation of JAK-STAT cascade	0.0306291	scrib wdr12 tacc3 tbx2b irf2a ppdpfa fer lin28a srrt pes polr3g melk uspl1 rhbdf1a six1a irf2 cx43 fgf16 hoxb8a htr1ab nat15 snapc4 LOC564840 sox2 mif tgfbi thpo usp13 ptmab mob1a purbb
tricarboxylic acid cycle	0.0307573	polr2eb uri1 polr2c polr2j polr2f polr2h polr2i polr2gl polr2l polr2k polr2a
response to heat	0.030967	aspn bgnb lrrc4.2 lrrc4ba f3b dcn socs6b si:dkey-6l15.1 cishb bgna podn socs3a socs3b il11ra cntfr stat4 il20ra rtn4rl2b lifrb crfb2 chad socs2 irf5 rtn4rl2a lrrtm1 il2rgb il12bb ghra il17ra1a socs6 cish nyx il1rapl1a socs5b crfb6 crfb1 crfb4 ifngr1 flrt1b il2rb flrt3 il10rb il7r flrt2 lrrc3ca zmp:0000000936 lrtm1 lifra f3a il10ra socs9 il4r.1 il6r jak2a
calcium ion transmembrane transport	0.0311874	spire2 gsna fmn2a evla spire1a vil1 gsnb fmn2b
actomyosin structure organization	0.0312636	elovl6 elovl5 elovl4a elovl4b elovl6l elovl2 elovl8b elovl8a elovl7a elovl1a elovl1b
pectoral fin development	0.0312639	fkbp8 fkbp9 cct7 cct8 fkbp4 cct4 bbs12 cct3 tcp1 cct6a fkbp1aa fkbp5 fkbp1ab fkbp11 fkbp14 fkbp2 fkbp10b cct5 fkbp1b hspd1 tor1
semicircular canal morphogenesis	0.031534	ada ampd3a rpusd4 adal cecr1b ampd2b ampd3b cecr1a rpusd2 ampd2a
protein ubiquitination	0.0315461	sox4a phactr4b sfrp1a pitx2 sfrp5 vax2 lmx1bb sox11a foxc1a sox11b sox4b tln1
ventral spinal cord interneuron differentiation	0.0318453	mnat1 cry-dash ruvbl1 rpa3 ube2al polb rpa1 zgc:112496 nabp1a wrnip1 rad52 fancl apex2 ddx11 fen1 zgc:110269 tdg.1 smarcad1a ercc4 rfc2 chd1l gtf2h2 ints3 ssrp1b xrcc3 msh2 rev1 rad17 smc3 cry5 vcp neil3 pif1 sfr1 ino80e ercc5 nsmce4a fanci rad51d gtf2h1 aptx rad18 inip poli h2afx nudt1 rbm17 ercc1 primpol smarcb1a rtel1 rfc5 gtf2h4 rad51b rpa2 ssrp1a rad50 poll nbn rad1 ddb2 rad51 dmap1 unga exo…
fibroblast growth factor receptor signaling pathway	0.0319756	cnr1 robo2 tnc erbb2 erbb3b nrp2b rtn4a neurog1
intracellular signal transduction	0.0323983	prkar2ab prkar2aa gpr157 prkar2b bves hcn4 popdc2 hcn4l prkar1aa si:dkey-100n23.5 prkar1ab LOC100334297
type B pancreatic cell development	0.0324366	polb pola2 rev1 pold1 poll polq pola1 lig3 prim2 pole rev3l lig1 lig4 polg mybbp1a pold2 tk1 polm
skeletal muscle tissue development	0.0324557	ptpn4b ptpn4a ptpra mtmr2 ptprfb ptp4a1 nt5dc1 ptpn1 phospho1 mtmr8 dusp8a dusp23a ssh1b ptpn11b fbp2 g6pca.2 cdc14aa ptpmt1 g6pcb alpi.1 alpl zgc:123305 ptprea ptpn2a mtmr6 nt5c1ba dusp5 acp5a ptprdb lpin1 ptpn11a fbp1b g6pc3 ptprz1b ptpreb fbp1a cdc14b ntpcr mtmr1b enoph1 ppm1e pudp pgp g6pca.1 rngtt ptprja nt5c1bb nt5c2l1 ptp4a2b ctdnep1b nt5c1aa ptprn2 ptpn2b ctdsp2 mtmr7a mtm1 dusp11 cdkn3 n…
endocrine pancreas development	0.0327796	atp5o si:dkey-28b4.8 atp7a atp2a2b atp2b1b atp5a1 atp5f1 atp5l atp2b1a atp5d atp2a1 atp2b3b atp2a2a atp13a1 atp2a1l atp2b3a atp5c1 atp7b atp2c1 atp2a3 atp13a2 atp2b2 atp5b atp5e atp5h
negative regulation of protein kinase activity	0.032939	tspan11 smo tspan2a crhr1 tspan33a cd9a tspan7b cbl calcrla calcrlb vipr2 zmp:0000000545 adgrl4 fzd9b prph2b tspan18b cblb tspan7 cd9b pth1rb cd82a rom1a adgrv1 prph2l fzd3a upk1a cd81b tspan36 cd63 tspan9a fzd5 gipr tspan35 cd82b rom1b adgrg1 mapk1 fzd7b mapkapk5 calcr vipr1a sst3 tspan12 cd36 sst1.2 gpr157 fzd9a zgc:110329 cd81a gcgrb prph2a cd151 fzd8b tspan15 sst1.1 fzd8a tspan9b tspan3b adcy…
kidney development	0.0330191	slc35a5 slc2a1a slc35a3a slc50a1 slc2a12 slc35b1 slc35a1 slc35a2
transmission of nerve impulse	0.033194	polb pola2 pold1 primpol poll polq pola1 prim2 pole rev3l polg mybbp1a si:dkey-28b4.7 pold2 polm
glomerulus development	0.0332562	oclnb mpp5b oclna mpp5a rab13 si:ch73-61d6.3 bves zgc:154006 frmpd2
cellular amino acid metabolic process	0.03337	slc7a9 slc6a16a slc7a10a slc7a14a slc7a1 slc38a4 si:dkeyp-120h9.1 slc7a3a slc38a9 slc7a2 slc36a4 si:ch73-352p4.8 slc38a2 slc38a8b slc7a6 slc7a7 slc32a1 slc7a3b slc7a4 slc6a17 slc7a11 slc7a8a slc38a10 slc7a5 zgc:63694 slc6a16b
ribosome biogenesis	0.0340039	kif1b hook1 ccdc88c kif1aa kif1ab kif13a kif13bb kif5ba kif5c ccdc88b kif3cb kif13ba kif3b
protein localization	0.0354589	picalma picalmb si:ch211-214j24.9 sh3bp4a si:ch211-200p22.4 clvs2 hip1 baiap3 snap91 hip1rb
activation of protein kinase activity	0.0355488	pde6a crtc1b pde10a pde3a pde11al pde6b pde4ca pde4a pde4d pde4ba pde7a pde5ab pde9a pde8b pde4bb pde6d pde2a pde6c pde6g pde6h
skeletal system development	0.0360765	or115-5 trpa1b or128-10 si:ch211-218m3.13 or118-2 or118-1 or126-7 LOC108180809 or123-1 or115-14 si:ch211-218m3.9 or125-2 or125-4 or129-1 or126-2 or128-1 or133-6 or133-5 or126-4 or126-5 or126-3
non-canonical Wnt signaling pathway	0.03661	avpr2aa npffr2a jun avpr1ab cckar npffr1l1 sik1 sik2b npffr1l2 jund junba si:dkey-178o16.4 avpr1aa ncoa3 sik2a zgc:153924
response to mechanical stimulus	0.036862	f3b prlra il11ra cntfr il20ra lifrb il2rgb il12bb ghra crfb6 crfb4 ifngr1 il2rb il7r lifra f3a il10ra il4r.1 il6r
axon guidance	0.0369317	coro2a arpc1a coro1b arhgap33 myoz2a cfl1l ivns1abpb cfl2 kptn baiap2l2a arpc5b cfl1 coro1cb ctnna2 tbx5a msrb1a arpc1b baiap2l1a ivns1abpa baiap2l1b tagln2 tpma arpc5lb coro1ca myoz2b klhl17 arpc5a arpc5la ttc17 vcla arpc4 coro1a myoz1a arpc4l baiap2a catip myoz3a wipf1b myoz1b arpc2 synpo2lb coro2ba peak1 zgc:86896 si:ch73-106g13.1 si:ch211-175f11.5 ctnna1
erythrocyte differentiation	0.0369499	abcd3b abcb4 atp6v1d abcc12 abca2 abcc2 abcc9 abcb5 si:dkey-57h18.2 abcb3l1 cftr abcc8 abcb9 abcb8 abca4a abcg2c abcc4 abcc5 abcb10 abcd4 abcc13 abca4b abcb7 abcg5 abcb6a abcb11b abca5 abcb6b abca1a abcd1 wu:fb13g09 abcc8b abcc10 abca1b abcg2b tap1 abcc6b.2 abcc3 abcd3a abcc1
transport	0.0375555	polr1e polr2eb znrd1 polr2f polr1d polr2h polr1c polr2l polr2k polr1b
lipoprotein metabolic process	0.0377019	lipib lipia ppme1 pnpla6 esd abhd2a lipg notum1a ache LOC100331214 ces2 lypla2 fam135a nceh1b.1 nlgn3b nlgn2a nlgn4b nlgn2b nlgn4a lpl notum2 lyplal1
embryonic camera-type eye development	0.038282	si:ch211-257p13.3 kifc3 dnah5l dnah12 dnah7 si:dkeyp-86b9.1 dnah3 dnah2
tissue regeneration	0.0383476	sdc2 celf1 myh11a ppm1k rnpc3 hdac1 klf5a mtch2 bmp4 nup62l klf6a dnmt1 mb fgfrl1a tdgf1 rps6ka3a stk11 mtor ruvbl2 epas1b apc nipblb polr3b nol9 mgaa seph ap1m1 ap1m2 gata6
vasculogenesis	0.0392688	ruvbl1 rpa3 rpa1 rad52 xrcc4 pif1 h2afx rtel1 rpa2 mei4 dclre1c rag2 rag1 lig3 ruvbl2 recql5 lig1 lig4 zswim7 mnd1 blm zgc:174877 si:dkey-26m3.1 wrn slx1b xrcc5
protein methylation	0.0393065	ap2m1a ap4b1 ap3m2 ap1b1 ap3m1 ap2m1b ap2b1 gga1 ap1m3 ap2a1 zgc:153847 ap4m1 ap1m1 ap1m2 si:ch73-157i16.3 ap1g1 gga3
lymphangiogenesis	0.0393137	tbx20 dia1a nkx2.5 myl7 nkx2.7 npr1a npr3 nppb nppa dia1b smarca4a cav1 ndrg4
proteasome-mediated ubiquitin-dependent protein catabolic process	0.0395474	si:dkey-202l16.5 ccdc114 rsph9 tlr4ba dnai1.2 ccsapb arhgef18b afg1lb wdr78 ccdc103 tp53bp2b hydin dnah5l dnah12 dnah7 ccdc151 dnah3 spa17 aftphb bbs1 tmem67 ocrl dnaaf4 glis2b ccdc40 cfap53 tmem141
clathrin coat assembly	0.0396711	ubiad1 prdx2 fam213b prdx6 sod1 fam213aa prdx1 prdx4 aaed1 srxn1
cell cycle arrest	0.0399268	gna11a gnaq vipr2 gna15.1 gnao1a gnai2b gnai2a gnai1 gna12a gnai3 rxfp2a gna14 gnao1b gnat2 gnav1 gnat1 gnaia gna11b rxfp3 vipr1b senp7b rxfp2l gpr84 vip gcga gnaz galr2b
adrenal gland development	0.0399651	elovl6 elovl5 elovl4a elovl4b elovl6l elovl2 elovl8b elovl8a elovl7a elovl1a elovl1b
protein phosphorylation	0.0402049	si:ch211-266g18.6 syt9a syt5b syt13 picalma picalmb si:ch211-214j24.9 si:ch211-200p22.4 syt9b syt1a syt4 syt5a sytl3 syt11b syt11a sytl2a sytl5 hip1 sytl1 sytl2b syt3 syt7b baiap3 syt15 doc2d doc2b snap91 syt12 sytl4 hip1rb
convergent extension involved in axis elongation	0.0403847	dstyk pard6b acy3.2 cse1l pard3ab asah2 slc34a2a pkd2 slc4a2a slc34a1a podxl prom1b atp6v1aa pard6gb mipa cftr emp2 slc9a3.1 abcg2c fam65b abcg5 pard6a slc12a10.2 atp6v1ab abcg2b acy3.1
regulation of MAPK cascade	0.0404726	dcun1d3 kctd5a kctd2 rbx1 dcun1d2a dcun1d2b rnf7 kctd17 anapc11
SMAD protein signal transduction	0.0411317	v2rl1 or115-5 or107-1 or128-10 si:ch211-218m3.13 or118-2 or118-1 or126-7 or106-1 LOC108180809 or123-1 or115-14 si:ch211-218m3.9 or125-2 or125-4 or109-7 or106-8 or106-2 or113-1 si:ch1073-22e3.1 or121-1 or126-2 or128-1 or115-9 or126-4 or126-5 or109-2 or126-3
phospholipase C-activating G-protein coupled receptor signaling pathway	0.0417006	slc26a3.2 ttyh3b clic2 ttyh2l slc26a2 glra1 ttyh2 slc26a5 clic4 slc26a1 ttyh3a cftr slc26a11 abcc4 clic5b ttyh1 slc26a10 clic1
pseudouridine synthesis	0.0418898	col4a4 col8a1b c1qtnf6b col11a1b c1ql3a plod2 colec11 c1ql2 col1a2 emilin1a col18a1a col4a6 col4a5 hbl4 col4a1 c1qtnf6a c1qtnf5 c1qtnf9 c1qtnf2 col8a2 colec12 col15a1b hbl3 col2a1a c1qtnf7 col8a1a ccbe1 c1qtnf1 hbl2 col10a1b col4a2 colec10
oligosaccharide metabolic process	0.0421994	prkag3b creg2 rassf6 zgc:56699 unk actn3b tdh2 prkacba zgc:112982 phgdh nav2b manea pfkfb3 txlng stxbp1a grb10a cwf19l1 zgc:103692 gale mylpfb zgc:85722 trmt2a ppp6c pdap1b ss18 sult1st4 rassf7b loxa dab1b si:ch73-70c5.1 fam91a1 commd2 dhrs7 ppp1caa dctn5 cryl1 eif5 pip4k2aa prkag1 ankrd16 acsl1b cndp2 chordc1a zgc:153896 phyhipla marcksa zgc:92630 zgc:110366 spam1 ccdc106a irf2bpl ldlrap1a cbwd …
microtubule-based movement	0.0429696	nalcn asic4b asic1a chrna1 tmem38a calhm2 piezo1 asic1c trpm1b
'de novo' protein folding	0.0429763	cct7 cct8 cct4 bbs12 cct3 tcp1 cct6a cct5 hspd1
tRNA processing	0.0430479	nrf1 thraa hoxb2a pms1 znf511 spi1b nr4a1 ncor2 dicer1 arl14ep puf60b mier1b nfyal irx2a rorab dnajc1 rxrbb tox4a bach1b tbx3a zfand5b lhx8a cers5 ercc3 nusap1 ercc6l tbx15 irx7 rpa3 dedd1 pdx1 meis3 gbx2 meis1a kdm5bb nr2f6b foxm1 sox9a rbpja foxa2 neurod4 nr2f6a polb tada2b nr1d2a pbrm1 rpa1 tlx1 isl2a isl1 bhlhe40 bach2b esr1 zgc:112496 tcf7l2 tbx21 rcor3 pin4 kmt2a sox4a six4a rxrgb tbr1b ybx…
pancreas regeneration	0.0431908	gucy1a3 adcy2b gc2 npr1b gucy2f gc3 adcy6b npr1a si:dkey-206f10.1 si:ch211-132f19.7 si:ch73-139e5.4 adcy2a adcy7 adcy6a adcy1a adcy3a gucy1b3 adcy5 npr2
hydrogen ion transmembrane transport	0.0434637	si:ch211-266g18.6 syt9a syt5b syt13 syt9b syt1a syt4 syt5a sytl3 syt11b syt11a sytl5 sytl1 syt3 syt7b syt15 doc2d doc2b rims2a syt12 sytl4
homophilic cell adhesion via plasma membrane adhesion molecules	0.0440996	stim2b grm2a sgk2b grm2b rem1 gem rrad stim1a stim1b sgk3 sgk2a tspan13a rem2 stim2a
translation	0.0443366	xrcc3 msh2 rad54l rad51d gtf2h1 rad51b rad51 gtf2h3 rad51c chd8
amino acid transmembrane transport	0.0461574	aco2 dpydb ddx11 lias aco1 iscub pold1 rtel1 ndufv1 isca2 etfdh exo5 nthl1 cdk5rap1 pola1 ndufs8a prim2 nubp1 nubp2 tyw1 ndufs7 sdhb mocs1
somitogenesis	0.0467575	rbpja rab23 gpr22a sept6 acvr1l atp6ap1b ikzf5 furina atr lamb1a wtip
establishment or maintenance of epithelial cell apical/basal polarity	0.0469108	optn snx14 ambra1a zgc:63831 atg3 zgc:100846 atg4a vcp atg5 nrbf2b gabarapl2 phf23a rnf185 nr1d1 map1lc3a gabarapa atg13 phf23b wipi2 fbxo32 wipi1 fundc1 zgc:92606 atg101 atg4da atg4c atg9a tigara gabarapb atg4b cisd2 smcr8a atg9b ctsd epg5 eva1a zgc:77041 atg12 becn1 usp13 wdr45 map1lc3c map1lc3b si:ch73-45o6.2 atg7
tRNA aminoacylation for protein translation	0.0469349	polr3gla polr3f polr3glb polr3g polr2eb polr2f polr3e polr1d polr3k polr2h polr1c polr2l polr3b crcp polr2k
erythrocyte development	0.0469809	pms1 kifc1 abcd3b hspa9 abce1 kif18a smarca2 mdn1 zgc:56231 hsp90aa1.1 abcb4 kif15 smarca1 abcc12 abca2 abcc2 kif23 abcc9 fignl1 kif25 asna1 vcp atp2a1 abcb5 katna1 atad1a spast mlh1 hltf macf1a atp13a1 si:dkey-86l18.8 abcf1 si:dkey-57h18.2 zgc:86811 abcb3l1 kif1b abcf2a rad50 kif20bb cftr zgc:103670 kif20a ola1 abcc8 abcf2b smarca5 kif19 si:ch211-257p13.3 kifc3 ruvbl2 abcb9 mlh3 atad1b abcb8 dna…
actin nucleation	0.0470945	exd2 pold1 exosc10 rad50 rad1 pola1 rad9a pole rev3l polg exd3 wrn mre11a
positive regulation of vasoconstriction	0.04715	supt6h h2afx morf4l1 h2afva zgc:101846 ubr2 tnrc18 bahcc1b bahd1 h2afy2 si:ch1073-159d7.11 h2afy si:ch73-368j24.13 LOC100331694 LOC797750
sphingolipid metabolic process	0.0472912	pdx1 rab23 gpr22a sept6 bmp4 gmnn prickle1a dnah7 ccdc151
lysosome organization	0.0473508	tnnc1a tpm4a tpma tnni2b.1 tnni4b.2 tnnc1b tnni1c tnni2a.1 tnni1b bin1b
neural crest cell development	0.0473646	fth1b cp fth1a zgc:56095 ireb2 aco1 iscub zgc:92066 zgc:172145 htt hephl1a abcb7 atp6v0d1 LOC558816 zgc:198419 zgc:173593 tfr1b zgc:109934 tfr1a hamp
stress-activated protein kinase signaling cascade	0.047606	agk dgkza dgkh dgkaa dgki si:dkey-172j4.3 dgkzb dgke
positive regulation of GTPase activity	0.0476205	esco2 uxt hmga1a nr1d1 mis18a arntl1b hmgn3 her2 tp63 lrmp myb kdm3b hmgn7 hmga2 hmga1b tnrc18 esco1 si:ch211-161c3.6 bahcc1b bahd1 fb06f03 oip5 si:ch73-281n10.2 hmgn2 h1m LOC100331694 LOC797750 si:ch73-1a9.3
neural crest cell migration	0.0476675	ftcd eif2b4 exosc10 eif2b2 crcp mri1 polr2d blm eif2b1 wrn
protein folding	0.0482959	nr1d2a bhlhe40 per3 clocka nr1d1 otx5 ciarta nfil3-6 nfil3-5
cell-matrix adhesion	0.0485934	acsm3 acot8 acot7 acot18 acot11b acot20 acot15 acot11a acot17
protein ubiquitination involved in ubiquitin-dependent protein catabolic process	0.0488343	tdh2 tdh atat1 gclc qdprb1 tsta3 zgc:100864 hmgcra ndufa9a sdr39u1 hmgcrb
positive regulation of cell proliferation	0.0490044	apoa1a stard3 apoa4b.2 cetp apoeb apoa4b.1 abcg2c abcg5 abcg1 abcg2b afp4 apoea
motor neuron axon guidance	0.0525856	pcdh8 adrb1 pcdh15b adra1ba erap1a lhx1a panx1b bdnf erap1b cyr61 adra1d panx1a pcdh17 si:ch211-106h11.3 adra1aa sst3 sst1.2 pcdh19 pyyb npy si:ch211-106j24.1 dhh shhb gpr101 sst1.1 anpepa adra1bb cx43 ctgfa pcdh18b pyya adrb3a wisp1a adrb2b cxcl14 ihha ngfa ntf3 si:ch73-233f7.1 panx2 shha gjd2b LOC565638 pcdh2ab1 pcdh12 wisp2 adrb2a pcdh2aa15 pcdh1gb9 LOC100006797 pcdh18a pcdh2ab8 pcdh2ab5 pcdh2…
blood vessel development	0.0526831	tmod2 mybphb obsl1a zgc:101810 tpm3 waslb dlg1 mybpc3 wasla wasa kptn tpm4b tmod4 cfl1 mybpc2b tpm4a wasb vangl2 tpma sorbs3 fscn1b brk1 pacsin1b mybpc1 lmod2b actr2a tmsb fscn1a sorbs2b fhod3b trpv4 dbn1 actr2b fscn2b diaph2 lmod1b tmsb4x tmod1 tpm1 tmsb2 dlg1l ctnna1 sorbs1 tmsb1 tpm2
phototransduction	0.0535292	clcn3 slc26a3.2 glra4a ttyh3b clic2 ttyh2l glra3 glra1 slc12a3 slc12a4 ttyh2 clcn7 clcn5a slc26a5 clcn5b clic4 slc26a1 clcn6 ttyh3a clcn4 cftr glrbb gabrg2 glra4b abcc4 slc12a9 clcn2c clcn1a gabra1 clic5b slc12a10.2 slc12a7a slc12a8 si:ch211-59d13.2 ttyh1 slc12a5b bsnd si:dkey-155h10.3 clns1a clic1
pigmentation	0.0535324	apoa1a stard3 scap apoa4b.2 erlin1 apoeb apoa4b.1 stard3nl erlin2 afp4 apoea stard4
ATP metabolic process	0.053567	csgalnact1a b4galnt3b chpf2 csgalnact2 b4galnt4b chpfb chpfa chsy1 csgalnact1b
negative regulation of cell death	0.0542509	scrib aplnra celf1 grapa yes1 itgav grap2a blk fyna fer usp9 usp33 ptk6a pak4 arpc5b cdc42bpb fermt2 grapb fynb fynrk podxl arpc5lb rhbdf1a aplnrb fscn1b grb2b arpc5a arpc5la cxcr4b elmo3 fzd2 si:dkey-56f14.7 rltpr hck apc fscn1a sdc4 ptk6b zranb1a pik3c2a sorbs2b amotl2a zranb1b elmo2 pak2a tnk1 met efnb2b fscn2b si:ch73-206d17.1 pik3c2b LOC100148041 elmo1 grap2b sorbs1 ndel1b jak2a grb2a
somite development	0.0543843	rab23 gpr22a ttc9c atp1a2a sept6 enpp2 ttc36 pkd2 acvr1l mespaa bmpr1aa bmp4 cfl1 gmnn ccsapb rp2 ttc4 armc4 dnah5l furina ccdc151 catip bbs4 lpar3 ttc39c wtip hspb7 nudc bmpr1ab
positive regulation of neurogenesis	0.0547038	noc3l sox9a pbrm1 ncapd2 rad21a phf8 phf21aa mta1 tmpoa meox1 foxn4 prkcbp1l mta2 gata1a wdr82 rbmx klf3 gata3 gata5 rad17 smc3 mcm5 ewsr1a phf21ab prkcbb nr5a1b mcm3 uri1 klf6a dnmt1 phf23a tada2a primpol nkap hif1ab per2 ncapd3 lrwd1 rad21b arntl1b phf23b hmgn3 zgc:113411 nfkb2 nr5a5 orc1 mcm4 cdc45 tp63 cdca5 sall4 hp1bp3 rnf8 cnbpa mta3 rel atoh1a mcmbp neurog1 ctcf zmynd11 smc1al gata1b gata…
vacuolar transport	0.0547621	ruvbl1 mcm5 pif1 mcm6l mcm4 ruvbl2 mcm6 chd8 peo1 mcm2
inner ear morphogenesis	0.0549407	mapkapk2a camkvb camk4 camk1gb camk2b1 mknk2a camk2d2 camkk1b mknk2b camk1db mknk1 mapkapk2b mapkapk5 camk1b camkk1a camk2d1 pnck camk1ga camk2a camk2g2 camkvl camk2g1 camk1da si:ch73-60h1.1
mRNA export from nucleus	0.0556149	itgb6 nid2b itgb2 parvb itgb4 si:ch211-39f2.3 sned1 itgb3b epdr1 epdl2 ilk tecta pxnb hpse nid1a frem1a itgb1a wu:fb77a09 epdl1 si:dkey-71b5.7 pxna si:dkey-261h17.1 LOC101882112 zgc:112964 si:ch73-329n5.6
purine nucleotide biosynthetic process	0.0558396	snrpc snrpd1 u2af2b u2af2a snrpd3 uhmk1 snrpd3l snrnp70 si:ch211-114c17.1 snrnp35 prpf39
cardiac muscle cell differentiation	0.0560554	acox1 acadvl acoxl zgc:85777 acads gcdha acox3 acadm acad8 ivd acad11 acad9 acadsb acadl gcdhb
bicellular tight junction assembly	0.0566356	rictorb fer parvb sipa1l1 mink1 parvab nphs2 parvaa parvg
cytokinesis	0.0568667	cyth3b fbxo8 cyth3a iqsec1b cyth1b gbf1 si:dkey-283b15.4 cyth4a ncf4 psd2 arfgef1 iqsec1a arfgef2 sec61b cyth1a arfgef3 iqsec2b iqsec3b iqsec3a LOC560461 cyth4b psd3l
phosphatidylinositol metabolic process	0.056949	cxcr3.1 enpp2 fer cxcl12a ackr4b ccl38.1 ccl38.6 cxcr4b cxcl12b ccr9a cxcr4a ackr3b ccl19a.1 ccr12b.1 fam65b ackr3a cxcr3.3 cxcl18b cxcl20 ackr4a si:ch73-206d17.1 cabz01093075.1 ccr6a cxcl11.5 ccr8.1 cxcl8b.1 cxcl8a
negative regulation of cell proliferation	0.058002	tenm1 ect2 si:ch211-12m10.1 frya cap1 vangl2 tagln2 cxcl12a si:dkey-34l15.2 fryl cxcl12b akap12b fryb cxcr4a si:dkey-237h12.3 capzb
regulation of blood pressure	0.0584623	loxa atp7a cp aoc2 loxl4 tyrp1a moxd1 loxl3b sod1 loxl2a loxl2b sco2 loxl1 f5 atp7b hephl1a cox11 aoc1 COX2 sco1 cox17 s100v2 loxl3a loxl5b lacc1 cutc pam f8
insulin receptor signaling pathway	0.0594954	adcyap1a foxl1 med27 dmbx1a pard3ab stk3 eftud2 mab21l2 bcor aldh7a1 thrb fzd5 igf1ra adcyap1b lhx2b paics igf1rb pitx2 egr1 ctbp2a rtn4a foxc1b crb2a shha pitx3 lepr abhd12 dlx4b rnf216 lepa foxc1a hmx1 lama1 cib2 rtn4b
protein polyubiquitination	0.059934	picalma picalmb si:ch211-214j24.9 si:ch211-200p22.4 caly cltca pik3c2a hip1 baiap3 cltcb cltcl1 snap91 hmp19
vesicle organization	0.0606121	pink1 per1b anos1a otpa nr4a2a bdnf olig2 nr4a2b id3 manf rem2 cdnf sncb
blood coagulation	0.0608477	dpysl3 actn1 baiap2l2a baiap2l1a baiap2l1b pls3 fscn1b pls1 fscn1a baiap2a fscn2b espn eps8
response to cadmium ion	0.0615625	usp49 casp9 fam63a ctsla caspa yod1 zgc:136872 capn12 otub1b capn9 usp5 atg4a zgc:171731 usp33 casp3a casp6l1 blmh uchl1 usp20 fam188a uchl3 zgc:92480 uspl1 zgc:103438 ctss1 ctslb ctsk usp22 ctsh capn3b ctsz atg4da atg4c zgc:55262 usp46 usp3 atg4b capn1a capn1b ctso casp3b ctsba si:dkeyp-50d11.2 otub1a LOC100331324 capn2b capn8 cflara senp3b usp30 casp8 otud5a capn15 usp16 senp5 senp7b tinagl1 uf…
establishment of cell polarity	0.0630344	tbx2b foxn4 kctd10 rhoua tbx5a has2 mmd actc1a id4 med10 tmsb4x dchs1b
muscle organ development	0.0631408	gys2 arhgap33 frya ctnnb1 acvr1l psen2 dvl3a fermt2 melk pafah1b1a fryl fryb dvl2 cytip amotl2a nwd1 si:ch211-175f11.5 si:dkey-276j7.2 ctnna1 numa1 cdh1
phospholipid metabolic process	0.0638993	ttyh3b clic2 ttyh2l glra1 ttyh2 clic4 ttyh3a cftr clic5b ttyh1 clic1
tRNA modification	0.0642606	tbp taf1 tbpl1 zgc:153409 taf4a taf10 si:dkey-219c3.2 taf9 taf6l taf6 taf12 si:dkey-23a13.7 zgc:163040
peptidyl-tyrosine autophosphorylation	0.0643168	cct7 cct8 cct4 bbs12 cct3 tcp1 cct6a cct5
protein homooligomerization	0.0646955	clockb arntl1a impdh2 clocka aanat1 arntl2 nfil3 dbpb dbpa prokr1a nocta noctb aanat2 prok2 nfil3-5 htr7c lypc
regulation of membrane potential	0.0657693	gucy1a3 adcy2b gc2 npr1b gucy2f gc3 adcy6b npr1a si:dkey-206f10.1 si:ch211-132f19.7 si:ch73-139e5.4 adcy2a adcy7 adcy6a adcy1a adcy3a gucy1b3 adcy5 adcy9 npr2
nucleotide biosynthetic process	0.0664866	slc25a24 txnl1 nfe2 ryr1b zgc:56493 nfe2l2a txn fancc nfe2l1b srxn1 lonp1
adenylate cyclase-modulating G-protein coupled receptor signaling pathway	0.067249	elovl6 elovl5 elovl4a elovl4b elovl6l elovl2 elovl8b elovl8a elovl7a elovl1a elovl1b
RNA phosphodiester bond hydrolysis, endonucleolytic	0.0692417	rpl3 rpl28 rpl23a rpl38 rpl12 rpl7 rpl15 rpl22l1 rpl21 rplp2l rpl19 znf622 rpl8 rpl27 rpl5b rpl35 rpl7a rpl5a rplp1 rpl18a rpl10 rpl34 rpl18 surf6 rpl30 rpl39 rpl9 rsl24d1 rpl4 rpl7l1 rpl10a rpl11 rpl13a rpl31 rpl23 rpl32 rpl36a rpl6 rpl22 coa1 rpl29 rpl35a rpl13 rpl36 rplp2 rpl26 rpl14
receptor clustering	0.0693637	ercc6l seh1l nup133 clasp2 nuf2 lrwd1 ska1 zwilch ndc80 spc24 cfdp1 meaf6 spdl1
positive regulation of proteasomal ubiquitin-dependent protein catabolic process	0.0705293	smarca2 smarcb1b smarca1 chd1l actr6 dpf3 tada2a smarcb1a mysm1 riox2 morf4l1 dmap1 smarca5 ruvbl2 ino80c ino80b vps72 dek ino80 top1l smarcc2 top1 arid1b arid1aa arid1ab actr8
negative regulation of endopeptidase activity	0.0729639	dpysl3 cdk20 atat1 elovl5 tmem57a snx14 unc119.1 glra1 ttc26 tmem57b arl13b pkd2 rsph9 b9d2 smn1 fermt2 clasp2 ift57 ctnna2 rilpl2 tmem218 podxl arl6 srgap2 phactr4b pi4k2a rab13 flr cep41 shtn1 bbs5 ccsapb arpin bbs2 tbc1d32 tmem237a ift172 pacsin1b tmem231 rp2 ccdc103 gpr161 cdc14ab cep19 bbs7 coq6 nckap1 tapt1b fam65b cfap77 wdr35 actr2b bbip1 arl3 tmem237b gper1 intu nphp3 tmem138 zgc:194281 …
regulation of nucleic acid-templated transcription	0.0736871	casp9 casp3a casp3b LOC100331324 cflara casp8 si:ch211-195h23.3 casp8l2 si:dkey-10c21.1 casp7 si:dkey-103e21.5 caspxa
positive regulation of pathway-restricted SMAD protein phosphorylation	0.0738026	nup133 hira chd3 chd4b hat1 lrwd1 morf4l1 las1l hdac5 hdac4 ing2
protein-chromophore linkage	0.0749252	rttn vangl2 lect2l si:dkey-224e22.2 ttc17 mustn1a si:ch211-71m22.1 si:dkey-26i13.8 catip ocrl si:dkey-165a24.9
hematopoietic stem cell differentiation	0.075435	ctnnb1 ctnnal1 ctnna2 jupb armc7 jupa gna13a ctnnd1 ctnna1
forebrain development	0.0756115	apex2 xrcc1 neil1 neil3 hmga1a zgc:110224 xpa unga nthl1 ogg1 mpg hmga1b mutyh recql4 si:ch211-141o9.10 dna2 si:ch211-161c3.6 ungb
regulation of translational initiation	0.0757841	cst3 kng1 cst14a.1 cst14a.2 fetub ctsf zgc:163030 si:ch211-284e20.8 si:busm1-57f23.1 zgc:194981
cell differentiation	0.0761955	scrib ctnnb1 ctnna2 epb41l5 cxadr tmem47 pvrl1a ajuba ctnna1 mpp7a wtip
metal ion transport	0.0773366	syf2 ddx19 xab2 crnkl1 sf3b6 snrpb snrpd1 snrpd3 rbmx pnn sf3b2 sf3a2 ddx23 snrnp40 prpf8 plrg1 magoh snrpd2 cdc40 sf3a1 bcas2 rbmx2 phf5a sf3b1 frg1 lsm7 isy1 smx5 nrde2 snrpd3l lsm3 prpf6 snrpg
peptidyl-serine phosphorylation	0.0776533	grpel1 bag5 bag1 ahsa1a bag2 pfdn6 bag3 bag4 hspe1 grpel2 si:ch211-207k7.4 ahsa1b timm44
glucose transmembrane transport	0.0782806	bloc1s1 snap25a pi4k2a bloc1s6 kxd1 snap25b snapin snap47 bloc1s3
regulation of intracellular pH	0.0784477	kbtbd12 klhl15 klhl32 arih1 spoplb bach2b klhl42 klhl41b spopla kctd5a keap1a klhl40b klhl24a pef1 kctd2 klhl38a bach2a klhl17 rbx1 klhl20 klhl40a klhl31 klhl21 LOC100334314 klhl14 si:ch211-256e16.3 klhl26 rnf7 kctd17 kbtbd3 klhl5 bach1a klhl35 si:rp71-68n21.9 klhl41a keap1b klhl30 kbtbd7 klhl23 klhl13 kbtbd2 klhl29 klhl22 klhdc8b si:dkey-229b18.3 spop klhl8 klhl7 klhl25 kbtbd11
axon extension	0.0790687	myh10 myh9b actn3b vill myhb epb41l3a spire2 pfn2 nav3 waslb wipf2b actn1 dmd nrap daam1b twf2b myh11a twf1b myoz2a fmnl2a pfn2l hcls1 myhz2 cfl1l dmtn actn3a cfl2 wasla daam1a wasa phactr4a kptn dbnlb cap1 si:dkeyp-57f11.2 cnn1a tln2a flnca flncb parvb phactr3b epb41l3b nf2a mical2b ezra cfl1 si:ch211-165e15.1 si:ch73-362m14.4 wasf2 ezrb msrb1a nf2b wasb cotl1 phactr2 lsp1 gmfb daam2 macf1a mtss…
heterophilic cell-cell adhesion via plasma membrane cell adhesion molecules	0.0791682	si:dkey-28b4.8 atp2a2b atp2b1b atp2b1a atp2a1 atp2b3b atp2a2a atp13a1 atp2a1l atp2b3a atp2c1 atp2a3 atp13a2 atp2b2
innate immune response	0.07925	cacnb3a cacnb1 si:dkey-28b4.8 cacng5a dennd5b atp2a2b slc24a3 cacna1ab atp2b1b cacna1c cacng1a cacnb4a ryr1a orai1a atp2b1a pkd2 trpv6 itpr1a slc24a4a dennd5a cacng8a atp2a1 cacna1ba pkd2l1 atp2b3b ryr1b trpc7a atp2a2a atp13a1 cacng2a pkd1b orai2 atp2a1l si:ch73-335m24.5 atp6v0cb cacna1aa cacng5b slc24a1 slc24a2 atp2b3a trpc6a tmem37 trpm5 trpv1 atp2c1 cacna1ha atp2a3 trpc1 itpr3 atp13a2 trpv4 ca…
protein K63-linked deubiquitination	0.08011	ap2m1a atat1 dnm1l sh3bp4a cltca clta cltb inpp5f cltcb cltcl1 hip1rb
head development	0.0825013	sh3gl3b med14 hey2 acvrl1 kdm4ab snx5 map3k7 lama4 hspa12b unc5b pdcd10a smad5 stk25b fli1b sestd1 spred1 notch3 etv2 fli1a figf kdm4c vegfc efnb2b ccbe1 si:ch211-79m20.1 ntn4 lama1 jak2a
chloride transport	0.0826639	lypd6 gpc4 gpc1a gpc5b efna2a gpc3 sprn dpep2 lpl gpc1b
optokinetic behavior	0.0845185	slit2 robo2 emx3 ntn1b fam57ba slit3 kctd13 coro1a ppp4ca mapk3 ntn1a
cellular response to xenobiotic stimulus	0.0845731	anapc16 ube2s anapc4 si:dkey-23c22.2 cdc23 anapc1 cdc26 anapc10 anapc15 anapc11
neural crest formation	0.0859241	si:ch73-111m19.2 ptgs2a ptgs2b txnl1 epx ubiad1 gpx8 gpx1a gsr prdx2 fam213b zgc:56493 mgst3b gpx3 prdx6 sod1 txn nxnl1 ptgs1 fam213aa prdx1 duox gpx4a prdx4 mgst2 aaed1 si:ch1073-179p4.3 srxn1 si:ch211-175m2.5 gpx7 pxdn txnrd1 mgst3a cat
translational initiation	0.086154	rfc2 gins4 rfc5 polq helb mcmbp rfc3 si:dkey-28b4.7
regulation of angiogenesis	0.0861563	cx43.4 gja3 si:dkey-91f15.8 gja5a cx32.3 cx28.9 cx43 cx30.3 cx35.4 gja5b gja8a cx39.4 gjd2b cx28.8 LOC565638 cx34.4 cx52.9 si:dkey-91f15.1
G-protein coupled serotonin receptor signaling pathway	0.0875197	tcf7l2 tcf7l1b eaf2 ankrd6b lef1 bcl9 tcf7l1a tcf7 ctnnbip1 jun bcl9l lzic apc apc2 eaf1 lzts2a amer2 chd8 amer1 dact3a si:ch211-168f7.5 si:dkey-231j24.3 hif1al ctnna1 cav1 med12
chordate embryonic development	0.0882836	slc26a3.2 vdac3 vdac2 slc4a4a slc4a8 slc4a1b slc4a2a slc26a1 slc4a4b vdac1 lrrc8ab slc4a2b slc13a2 slc4a10b slc4a10a slc4a7 si:zfos-323e3.4 lrrc8c lrrc8da slc4a5
transmembrane receptor protein serine/threonine kinase signaling pathway	0.0884457	polr1e polr3gla polr3f polr3glb twistnb polr3g polr2eb primpol polr2c polr2j znrd1 polr2f polr3e polr1d polr3k polr1c prim1 polr2i prim2 polr2gl polr3c polr2l polr3b crcp polr2k polr2d polr1b polr1a polr2b polr2a polrmt polr3a polr3h
mRNA transport	0.0885637	tenm1 pvrl3b cadm2a si:ch211-12m10.1 mllt4a cadm1a si:dkey-34l15.2 cadm4 gypc cadm1b cd226 cadm3 cadm2b si:ch73-22o12.1 si:dkey-31e10.5 pvrl1a si:ch211-119e14.9 zgc:172122 si:dkey-237h12.3 crtam
fatty acid biosynthetic process	0.0887315	mycbp2 smo isl2a slit2 robo3 ncam1b efnb1 dpysl5a anos1a efna3a robo2 usp33 efna1b efnb2a tnr vax1 tnc si:ch211-57i17.1 fez1 gli2a robo1 nrp1b efna1a ccdc80l1 lhx2b efna2a dpysl2b lamc1 cxcl12a nrp2b cxcr4b efnb3b rtn4a slit1a pbx4 crmp1 draxin nfasca cntn3a.1 shha col2a1a si:dkey-288i20.2 efnb2b kif5ba boc neo1 hdc kif5c zgc:198329 LOC100332852 si:dkey-1c11.1 ngfra ngfrb efna5a rtn4r LOC10817950…
embryonic pectoral fin morphogenesis	0.0888291	ube2h myh10 pms1 dstyk mapk14a myh9b dicer1 map4k2 kifc1 uckl1a prkacba atp1a1a.4 nav2b pink1 ak1 pfkfb3 myhb csnk2a1 stk25a rtca p2rx2 atm ercc3 ercc6l mapkapk2a ruvbl1 atp1a1a.1 si:dkey-28b4.8 abcd3b prkcea ube2al limk1b eif4a1b hspa9 pomk pank2 ippk hsp90b1 hars lats1 pip4k2aa cdk20 galk2 tie1 mvk ulk4 yrk p2rx5 plk4 ntrk1 epha7 zgc:101810 ptk2ab mylkb hspa4a fgfr3 rock2b limk2 atp2a2b camkvb …
pharyngeal system development	0.0897461	scrib si:ch211-247n2.1 cacnb3a cacnb1 exoc4 penka cep89 npy8br dlg1 cacnb4a sdcbp2 dlgap1a slc12a4 pnocb synj1 ompb oprd1b npy1r oprm1 slc6a1b rapsn slc17a6b slc6a1l nrxn3a slc6a1a htr1d kcnq3 apba2b nrxn2a si:dkey-110c1.7 htr4 slc12a7b cacnb4b apba2a sstr1b plcb3 oprl1 slc12a7a prokr1a tacr2 hdc si:ch211-59d13.2 dlg3 slc12a5b LOC556451 npy2rl htr7c dlg2 dlg1l gpr19 apba1a
cell redox homeostasis	0.0902926	mtfr1l uqcrb pmpcb cox6a1 mtfr1 uqcrc1 cox6a2 uqcrh mtfr2 cox19 COX1 sdhb chchd5 cox20 uqcr10
negative regulation of canonical Wnt signaling pathway	0.0911975	wnt2ba wnt11r bmp4 nkx6.1 wnt7ba sox12 wnt2bb wnt9b wnt6a wnt3 wnt4b wnt2 wnt7aa wnt7bb wnt4a wnt16 wnt5b
Arp2/3 complex-mediated actin nucleation	0.091219	chrna5 chrna2a chrna1 chrnb2b chrnd chrnb2l chrne chrnb3b chrnb3a chrna6 chrna2b chrnb1 chrna4b chrng chrnb4 chrna7
sphingolipid biosynthetic process	0.0916699	atp1a1a.1 rbpja fgf8a ippk cnpy1 gpr22a celf1 tbx16 atp1a2a sept6 enpp2 bmpr2a rfx2 pkd2 acvr1l dmrt2a trib3 bmp7a ugdh smarcd3b bmp4 bmpr2b sesn1 ift57 tsc1a ift88 arl6 tdgf1 znf703 smad5 flr ssx2ipa wdr18 bbs2 ahi1 arhgef11 ccdc103 aldh1a2 fzd2 slc8a4a gpr161 ikzf5 jazf1b dub bbs7 dnah7 exoc5 stk36 ccdc151 bbs4 shha zic3 bbs1 chd7 grk5l megf8 foxj1b sgcd ccdc40 cfap53 lpar3 foxj1a numbl
intracellular transport	0.0917628	adcy2b adcy6b si:dkey-206f10.1 si:ch211-132f19.7 adcy2a adcy7 adcy6a adcy1a adcy3a adcy5
cellular iron ion homeostasis	0.093703	hars iars sars mars2 qars wars2 tars rars2 mars yars cars irs2a iars2 pars2 vars rars vars2 gars eprs dars2 nars dalrd3 aars dars yars2 cars2 fars2 nars2 farsa sars2 kars
neuromast development	0.0937187	atm ruvbl1 chchd6a ddx39aa apex2 ddx11 fen1 zgc:110269 smarcad1a ddx39ab ints3 ssrp1b msh2 ubr5 rev1 ints7 vcp pif1 sfr1 dtl chek2 inip h2afx primpol rrm2b rtel1 ddx39b gtf2h4 tipin nek12 ssrp1a uba1 alkbh7 nek4 nbn ddb2 si:dkey-23c22.2 unga exo5 rnf169 nthl1 abraxas2a rbbp8 ube2w rnf8 kin dclre1c mcm10 apex1 spata18 lig3 wdr76 ruvbl2 sbk3 apc topbp1 lig1 cul4b lig4 usp16 trip12 chaf1a fbxo31 bra…
ATP hydrolysis coupled cation transmembrane transport	0.0940118	chrna5 slc18a3a chrna2a chrna1 chrnb2b chrnd chrnb2l chrne chrnb3b chrnb3a chrna6 chrna2b chrnb1 chrna4b chrng
phosphatidylinositol-3-phosphate biosynthetic process	0.0945391	cxcl12a ccl38.1 ccl38.6 cxcl12b cxcl14 ccl19a.1 ccl25b ccl44 cxcl18b cxcl20 cxl34b.11 cxcl11.5 LOC100141478 ccl39.3 LOC101884623 cxcl8b.1 cxcl8a
formation of translation preinitiation complex	0.0950453	col4a4 col14a1a lamc1 loxl2a loxl2b col4a6 col4a5 fras1 col4a1 lamc2 frem1a frem3 vwa2 col4a2
enteric nervous system development	0.0952987	ak1 ak2 ak4 atp5a1 atp6v1ba ndufaf7 atp6v1aa atp6v1b2 atp5b atp6v1ab
blood circulation	0.0957456	vill mybphb obsl1a tpm3 coro2a actn1 arpc1a coro1b aif1l myh11a tnnc1a gsna mybpc3 dbnlb si:dkeyp-57f11.2 tln2a ctnnal1 flncb arpc5b tpm4b tmod4 coro1cb mybpc2b tpm4a ctnna2 arpc1b tagln2 tpma arpc5lb coro1ca klhl17 tnnc1b pls3 fscn1b arpc5a pls1 shtn1 palld vil1 arpc5la vcla gsnb tagln mybpc1 ush1c coro1a svila frg1 scinlb fscn1a flii myo5aa tnnc2 flna fscn2b LOC103908677 myo18aa triobpa arpc2 s…
GTP biosynthetic process	0.0970443	f3b serpind1 prkcbb plg f2 pdgfbb si:dkey-163m14.2 f2r ano6 vwf f2rl1.2 pdgfc pdgfd LOC100333265 si:dkey-163m14.7 f2rl2 f3a f8
platelet activation	0.0976056	mvk apoa1a apoa4b.2 apoeb apoa4b.1 cyp51 pmvk afp4 mvda apoea
cytokine-mediated signaling pathway	0.0976568	dap tnfrsf21 hdr tnfrsfa tnfrsf1a apaf1 fas cd40 nradd dido1 uacab tnfrsf9a zgc:153759 zgc:153631 uacaa tnfrsf1b mllt11 tnfrsf11a ngfra ngfrb tnfrsf9b si:dkey-23c22.9 si:dkey-260g12.1
retina layer formation	0.0979392	dynll2b dynlrb1 dctn4 dync1li2 wdr34 dynll1 dync1i1 dynll2a dync1i2a dync1li1 dync1i2b
heart contraction	0.0979883	bmpr2a rgma acvr1l fcho1 bmp6 bmp7a tgfb3 bmpr1aa bmpr2b tgfb2 smad1 hfe2 lef1 tob1a rgmd smad5 tgfb1a lft2 bmp3 bmp10 scube1 bmp7b tgfb2l gdf10b rgmb gdf10a bmpr1ba bmpr1ab
definitive hemopoiesis	0.0989421	rbpja hey2 nkx2.5 acvrl1 tnnt2a sox7 notch1b sox18 bmp10 dll4
